# Supplementary material for: Effectiveness and Safety of Apixaban in over 3.9 Million People with Atrial Fibrillation: A Systematic Review and Meta-Analysis
Source: MDPI journal article supplement (doi:10.3390/jcm11133788), 2022-06-30
Supplement: s1 [file s1]

## **Supplementary Material**

### **Comparison of the effectiveness and safety of apixaban compared with oral anticoagulants: a systematic review and meta-analysis of real-world and trial evidence**

Benjamin J. R. Buckley, Deirdre A. Lane, Peter Calvert, Juqian Zhang, David Gent, C. Daniel

Mullins, Paul Dorian, Shun Kohsaka, Stefan H. Hohnloser, Gregory Y. H. Lip

**Supplement S1.** Full search strategies

**Supplement S2.** Characteristics of included studies

**Supplement S3.** Risk of bias of included studies

**Supplement S4.** Sub-group meta-analyses

## Supplement S1. Full search strategies for Web of Science, Pubmed, and SCOPUS

### Summary of hits

9246 Identified

2602 Duplicates removed

6644 Screened for full text review

### Web of Science = 4,830

TS=(Atrial fibrillation)

AND

TS=(NOAC OR non vitamin k oral anticoagulant OR novel oral anticoagulant OR DOAC OR direct oral anticoagulant OR Apixaban OR Dabigatran OR Rivaroxaban OR Edoxaban OR vitamin K antagonist VKA OR warfarin OR coumadin OR 4hydroxycoumarin\* OR acenocoumar\* OR acenocumar\* OR coumarin\* OR cumarin\* OR ethyl biscoumacetate OR phenprocoum\* OR phenprocum\* OR dicoumar\* OR dicumar\* OR fluindione OR phenindione OR clorindione OR diphenadione)

AND

TS=(Stroke OR Mortality OR Death OR Bleed\* OR Adverse event\* OR Hemorrhage OR Haemorrhage OR thromb\* OR Embol\*)

AND

TS=(Randomised controlled trial OR Clinical trial OR Real-world data OR Cohort OR Observational OR Longitudinal OR Time series)

### Pubmed = 3,753

((Atrial fibrillation[Title/Abstract]) AND (NOAC[Title/Abstract] OR non-vitamin k oral anticoagulant[Title/Abstract] OR novel oral anticoagulant[Title/Abstract] OR DOAC[Title/Abstract] OR direct oral anticoagulant[Title/Abstract] OR Apixaban[Title/Abstract] OR Dabigatran[Title/Abstract] OR Rivaroxaban[Title/Abstract] OR Edoxaban[Title/Abstract] OR vitamin K antagonist[Title/Abstract] OR VKA[Title/Abstract] OR warfarin[Title/Abstract] OR coumadin[Title/Abstract] OR 4-hydroxycoumarin\*[Title/Abstract] OR acenocoumar\*[Title/Abstract] OR acenocumar\*[Title/Abstract] OR coumarin\*[Title/Abstract] OR cumarin\*[Title/Abstract] OR ethyl biscoumacetate[Title/Abstract] OR phenprocoum\*[Title/Abstract] OR phenprocum\*[Title/Abstract] OR dicoumar\*[Title/Abstract] OR dicumar\*[Title/Abstract] OR fluindione[Title/Abstract] OR phenindione[Title/Abstract] OR clorindione[Title/Abstract] OR diphenadione[Title/Abstract])) AND (Stroke[Title/Abstract] OR Mortality[Title/Abstract] OR Death[Title/Abstract] OR Bleed\*[Title/Abstract] OR Adverse event\*[Title/Abstract] OR Hemorrhage[Title/Abstract] OR Haemorrhage[Title/Abstract] OR thromb\*[Title/Abstract] OR Embol\*[Title/Abstract])) AND (Randomised controlled trial OR Clinical trial OR Real-world data OR Cohort OR Observational OR Longitudinal OR Time series) AND (("2009"[Date - Publication] : "3000"[Date - Publication]))

### SCOPUS = 663

( TITLE-ABS-KEY ( atrial AND fibrillation ) AND TITLE-ABS-KEY ( noac ) OR TITLE-ABS-KEY ( non-vitamin AND k AND oral AND anticoagulant ) OR TITLE-ABS-KEY ( novel AND oral AND anticoagulant ) OR TITLE-ABS-KEY ( doac ) OR TITLE-ABS-KEY ( direct AND oral AND anticoagulant ) OR TITLE-ABS-KEY ( apixaban ) OR TITLE-ABS-KEY ( dabigatran ) OR TITLE-ABS-KEY ( rivaroxaban ) OR TITLE-ABS-KEY ( edoxaban ) OR TITLE-ABS-KEY ( vitamin AND k AND antagonist ) OR TITLE-ABS-KEY ( vka ) OR TITLE-ABS-KEY ( warfarin ) AND TITLE-ABS-KEY ( coumadin ) OR TITLE-ABS-KEY ( 4-hydroxycoumarin\* ) OR TITLE-ABS-KEY ( acenocoumar\* ) OR TITLE-ABS-KEY ( acenocumar\* ) OR TITLE-ABS-KEY ( coumarin\* ) OR TITLE-ABS-KEY ( cumarin\* ) OR TITLE-ABS-KEY ( ethyl AND biscoumacetate ) OR TITLE-ABS-KEY ( phenprocoum\* ) OR TITLE-ABS-KEY ( phenprocum\* ) OR TITLE-ABS-KEY ( dicoumar\* ) OR TITLE-ABS-KEY ( dicumar\* ) OR TITLE-ABS-KEY ( fluindione ) OR

TITLE-ABS-KEY ( phenindione ) OR TITLE-ABS-KEY ( clorindione ) OR TITLE-ABS-KEY ( diphenadione )  
AND TITLE-ABS-KEY ( stroke ) OR TITLE-ABS-KEY ( mortality ) OR TITLE-ABS-KEY ( death ) OR  
TITLE-ABS-KEY ( bleed\* ) OR TITLE-ABS-KEY ( adverse AND event\* ) OR TITLE-ABS-KEY ( hemorrhage ) OR TITLE-ABS-KEY ( haemorrhage ) AND TITLE-ABS-KEY ( thromb\* ) OR TITLE-ABS-KEY ( embol\* ) ) AND PUBYEAR > 2008

## Supplement S2.

**Table S1.** Summary of study characteristics including the study design, intervention and comparator details, outcomes, and overall summary of findings in terms of impact of apixaban vs. comparator (other DOACs or VKAs).

| First author, Year, country<br><br>Study design           | Apixaban<br><i>n</i> =participants<br>mean (±SD) Age (years)<br>% Female/Male<br>Charlson comorbidity index<br>CHA <sub>2</sub> DS <sub>2</sub> -VASc score<br>HAS-BLED score | Comparator(s)<br><i>n</i> =patients<br>mean (±SD) Age (years)<br>% Female/Male<br>Charlson comorbidity index<br>CHA <sub>2</sub> DS <sub>2</sub> -VASc score<br>HAS-BLED score                       | Outcomes                                                                                                  | Follow-up                                                                                       | Impact of Apixaban<br><br>+ Favours Apixaban<br>- Favours comparator<br>= No difference /<br>uncertain |
|-----------------------------------------------------------|-------------------------------------------------------------------------------------------------------------------------------------------------------------------------------|------------------------------------------------------------------------------------------------------------------------------------------------------------------------------------------------------|-----------------------------------------------------------------------------------------------------------|-------------------------------------------------------------------------------------------------|--------------------------------------------------------------------------------------------------------|
| Abraham, 2017, USA [59]<br><br>Retrospective cohort study | 6,542 AF patients on Apixaban<br>Mean age 72.2 (±11.1)<br>46% Female<br><br>6,565 AF patients on Apixaban<br>Mean age 72.3 (±11.1)<br>46% Female                              | 6,542 AF patients on Dabigatran<br>Mean age 72.1 (±10.5)<br>46% Female<br><br>6,565 AF patients on Rivaroxaban<br>Mean age 72.1 (±11.2)<br>46% Female                                                | GI bleed                                                                                                  | Apixaban = 89 days<br>Dabigatran = 120 days<br><br>Apixaban = 89 days<br>Rivaroxaban = 106 days | +                                                                                                      |
| Adeboyeje, 2017, USA 48<br><br>Retrospective cohort study | 3,689 AF patients on Apixaban<br>Mean age 69<br>41% Female                                                                                                                    | 23,431 AF patients on Warfarin<br>Mean age 73<br>44% Female<br><br>8,539 AF patients on Dabigatran<br>Mean age 66<br>35% Female<br><br>8,398 AF patients on Rivaroxaban<br>Mean age 67<br>39% Female | Time to first major bleeding-related hospitalisation.<br>Major GI bleeding<br>Major Intracranial bleeding | Apixaban = 139 days<br>Warfarin = 285 days<br>Dabigatran = 212 days<br>Rivaroxaban = 169 days   | +                                                                                                      |
| Al-Khalili, 2016, Sweden 45                               | 251 AF patients on Apixaban<br>Mean age 73 (±8)                                                                                                                               | 233 AF patients on Dabigatran<br>Mean age 72 (±8)                                                                                                                                                    | Arterial thromboembolic events                                                                            | Apixaban = 348 days (IQR 267-419)                                                               | =                                                                                                      |

| First author, Year, country<br><br>Study design  | Apixaban<br><i>n</i> =participants<br>mean (±SD) Age (years)<br>% Female/Male<br>Charlson comorbidity index<br>CHA <sub>2</sub> DS <sub>2</sub> -VASc score<br>HAS-BLED score                                                                                                     | Comparator(s)<br><i>n</i> =patients<br>mean (±SD) Age (years)<br>% Female/Male<br>Charlson comorbidity index<br>CHA <sub>2</sub> DS <sub>2</sub> -VASc score<br>HAS-BLED score                                                                                                      | Outcomes                                                                       | Follow-up                                                                   | Impact of Apixaban<br><br>+ Favours Apixaban<br>- Favours comparator<br>= No difference / uncertain |
|--------------------------------------------------|-----------------------------------------------------------------------------------------------------------------------------------------------------------------------------------------------------------------------------------------------------------------------------------|-------------------------------------------------------------------------------------------------------------------------------------------------------------------------------------------------------------------------------------------------------------------------------------|--------------------------------------------------------------------------------|-----------------------------------------------------------------------------|-----------------------------------------------------------------------------------------------------|
| Retrospective cohort study                       | 49% Female                                                                                                                                                                                                                                                                        | 49% Female<br><br>282 AF patients on Rivaroxaban<br>Mean age 73 (±8)<br>50% Female                                                                                                                                                                                                  | All-cause mortality<br>Major bleed                                             | Dabigatran = 367 days (IQR 183-493)<br>Rivaroxaban = 432 days (IQR 255-546) |                                                                                                     |
| Alcuskys, 2020, USA 21<br><br>Retrospective      | 2,881 AF patients on Apixaban<br>Median age 84 (77-89)<br>69% female<br>Median CHA <sub>2</sub> DS <sub>2</sub> -VASc 5 (4-6)                                                                                                                                                     | 2,881 AF patients on Warfarin<br>Median age 84 (76-79)<br>68% female<br>Median CHA <sub>2</sub> DS <sub>2</sub> -VASc 5 (4-6)                                                                                                                                                       | Ischemic stroke/TIA<br>Ischemic stroke<br>Bleeding<br>AMI/VTE/SE<br>Mortality  | Follow-up continued until a study outcome                                   | =                                                                                                   |
| Amin, 2017, USA 60<br><br>Retrospective with PSM | 20,803 Apixaban-Warfarin pairs.<br>Apixaban:<br>Mean age 78.4 (±7.4)<br>52% female<br>Mean Deyo-Charlson 2.8 (±2.6)<br>Mean CHA <sub>2</sub> DS <sub>2</sub> -VASc 4.6 (±1.7)<br>Mean HAS-BLED 3.3 (±1.2)                                                                         | 20,803 apixaban-warfarin pairs.<br>Warfarin:<br>Mean age 78 (±7.5)<br>52% female<br>Mean Deyo-Charlson 2.9 (±2.6)<br>Mean CHA <sub>2</sub> DS <sub>2</sub> -VASc 4.7 (±1.7)<br>Mean HAS-BLED 3.3 (±1.2)                                                                             | Stroke/SE<br>Major bleeding                                                    | Apixaban = 171.2 days<br>Warfarin = 196.2 days                              | +                                                                                                   |
| Amin 2018, USA 61<br><br>Retrospective with PSM  | 8,328 Apixaban-warfarin pairs:<br>Apixaban:<br>Mean age 73.5 (±10.7)<br>45% Female<br>Mean Charlson 2.4 (±2.3)<br>Mean CHA <sub>2</sub> DS <sub>2</sub> -VASc 3.9 (±1.8)<br>Mean HAS-BLED 2.81 (±1.31)<br><br>3,557 Apixaban-Dabigatran pairs. Apixaban:<br>Mean age 70.9 (±11.4) | 8,328 Apixaban-warfarin pairs:<br>Warfarin:<br>Mean age 73.4 (±10.4)<br>46% Female<br>Mean Charlson 2.36 (±2.33)<br>Mean CHA <sub>2</sub> DS <sub>2</sub> -VASc 3.9 (±1.8)<br>Mean HAS-BLED 2.8 (±1.3)<br><br>3,557 Apixaban-Dabigatran pairs. Dabigatran:<br>Mean age 70.7 (±11.2) | All-cause hospitalisation<br>Hospitalisations due to stroke and major bleeding | 12-months                                                                   | +                                                                                                   |

| First author, Year, country<br><br>Study design   | Apixaban<br><i>n</i> =participants<br>mean (±SD) Age (years)<br>% Female/Male<br>Charlson comorbidity index<br>CHA <sub>2</sub> DS <sub>2</sub> -VASc score<br>HAS-BLED score                                                                                                                                                                | Comparator(s)<br><i>n</i> =patients<br>mean (±SD) Age (years)<br>% Female/Male<br>Charlson comorbidity index<br>CHA <sub>2</sub> DS <sub>2</sub> -VASc score<br>HAS-BLED score                                                                                                                                                              | Outcomes                                                                                                                                                                    | Follow-up                          | Impact of Apixaban<br><br>+ Favours Apixaban<br>- Favours comparator<br>= No difference / uncertain |
|---------------------------------------------------|----------------------------------------------------------------------------------------------------------------------------------------------------------------------------------------------------------------------------------------------------------------------------------------------------------------------------------------------|---------------------------------------------------------------------------------------------------------------------------------------------------------------------------------------------------------------------------------------------------------------------------------------------------------------------------------------------|-----------------------------------------------------------------------------------------------------------------------------------------------------------------------------|------------------------------------|-----------------------------------------------------------------------------------------------------|
|                                                   | 39% Female<br>Mean Charlson 2.0 (±2.2)<br>Mean CHA <sub>2</sub> DS <sub>2</sub> -VASc 3.5 (±1.8)<br>Mean HAS-BLED 2.56 (±1.28)<br><br>8,440 apixaban-rivaroxaban pairs. Apixaban:<br>Mean age 72.8 (±11.1)<br>44% Female<br>Mean Charlson 2.3 (±2.3)<br>Mean CHA <sub>2</sub> DS <sub>2</sub> -VASc 3.8 (±1.8)<br>Mean HAS-BLED 2.75 (±1.30) | 30% Female<br>Mean Charlson 2.0 (±2.1)<br>Mean CHA <sub>2</sub> DS <sub>2</sub> -VASc 3.5 (±1.8)<br>Mean HAS-BLED 2.6 (±1.3)<br><br>8,440 apixaban-rivaroxaban pairs. Rivaroxaban:<br>Mean age 72.5 (±10.8)<br>44% Female<br>Mean Charlson 2.3 (±2.3)<br>Mean CHA <sub>2</sub> DS <sub>2</sub> -VASc 3.8 (±1.8)<br>Mean HAS-BLED 2.7 (±1.3) |                                                                                                                                                                             |                                    |                                                                                                     |
| Amin, 2019a, USA 62<br><br>Retrospective with PSM | 37,525 patients on Apixaban<br>Mean age 78.4 (±7.5)<br>52% Female<br>Mean Charlson 2.9 (±2.6)<br>Mean CHA <sub>2</sub> DS <sub>2</sub> -VASc 4.6 (±1.8)<br>Mean HAS-BLED 3.4 (±1.3)                                                                                                                                                          | 37,525 patients on Warfarin<br>Mean age 78.4 (±7.4)<br>52% Female<br>Mean Charlson 2.9 (±2.7)<br>Mean CHA <sub>2</sub> DS <sub>2</sub> -VASc 4.7 (±1.7)<br>Mean HAS-BLED 3.4 (±1.3)                                                                                                                                                         | Stroke/SE<br>Major bleeding<br>Net clinical outcome<br>MACE                                                                                                                 | Mean duration 8-10 months          | +                                                                                                   |
| Amin, 2019b, USA 63<br><br>Retrospective with PSM | Apixaban vs Warfarin<br>10,570 patients on Apixaban<br>Mean age 80.4<br>54% Female<br>Mean CHA <sub>2</sub> DS <sub>2</sub> -VASC 5.4<br>Mean HAS-BLED 3.7<br>Mean Charlson 5.7<br><br>Apixaban vs Dabigatran<br>4,263 patients on Apixaban<br>Mean age 78.7                                                                                 | Apixaban vs Warfarin<br>10,570 patients on Warfarin<br>Mean age 80.4<br>54% Female<br>Mean CHA <sub>2</sub> DS <sub>2</sub> -VASC 5.4<br>Mean HAS-BLED 3.7<br>Mean Charlson 5.7<br><br>Apixaban vs Dabigatran<br>4,263 patients on Dabigatran<br>Mean age 78.8                                                                              | Stroke / SE<br>Ischaemic stroke<br>Haemorrhagic stroke<br>Major bleeding<br>GI bleeding<br>Intracranial haemorrhage<br>Other bleeding<br>Major adverse cardiac event (MACE) | Mean 6-8 months across all cohorts | +                                                                                                   |

| First author, Year, country<br><br>Study design                                           | Apixaban<br><i>n</i> =participants<br>mean (±SD) Age (years)<br>% Female/Male<br>Charlson comorbidity index<br>CHA <sub>2</sub> DS <sub>2</sub> -VAsC score<br>HAS-BLED score                                                                                                                     | Comparator(s)<br><i>n</i> =patients<br>mean (±SD) Age (years)<br>% Female/Male<br>Charlson comorbidity index<br>CHA <sub>2</sub> DS <sub>2</sub> -VAsC score<br>HAS-BLED score                                                                                                                       | Outcomes                                                                 | Follow-up                                                                                                                                                           | Impact of Apixaban<br><br>+ Favours Apixaban<br>- Favours comparator<br>= No difference / uncertain |
|-------------------------------------------------------------------------------------------|---------------------------------------------------------------------------------------------------------------------------------------------------------------------------------------------------------------------------------------------------------------------------------------------------|------------------------------------------------------------------------------------------------------------------------------------------------------------------------------------------------------------------------------------------------------------------------------------------------------|--------------------------------------------------------------------------|---------------------------------------------------------------------------------------------------------------------------------------------------------------------|-----------------------------------------------------------------------------------------------------|
|                                                                                           | 52% Female<br>Mean CHA <sub>2</sub> DS <sub>2</sub> -VASC 5.2<br>Mean HAS-BLED 3.5<br>Mean Charlson 5.2<br><br>Apixaban vs Rivaroxaban<br>10,477 patients on Apixaban<br>Mean age 80.4<br>54% Female<br>Mean CHA <sub>2</sub> DS <sub>2</sub> -VASC 5.4<br>Mean HAS-BLED 3.7<br>Mean Charlson 5.7 | 51% Female<br>Mean CHA <sub>2</sub> DS <sub>2</sub> -VASC 5.2<br>Mean HAS-BLED 3.5<br>Mean Charlson 5.3<br><br>Apixaban vs Rivaroxaban<br>10,477 patients on Rivaroxaban<br>Mean age 80.3<br>54% Female<br>Mean CHA <sub>2</sub> DS <sub>2</sub> -VASC 5.4<br>Mean HAS-BLED 3.7<br>Mean Charlson 5.7 | Myocardial infarction<br>All-cause mortality                             |                                                                                                                                                                     |                                                                                                     |
| Andersson, 2018, Denmark 64<br><br>Retrospective with PSM                                 | Apixaban vs Dabigatran<br>3,235 patients on Apixaban<br>63% Male<br>Mean age 67.6 (±8.2)<br><br>Apixaban vs Rivaroxaban<br>3,676 patients on Apixaban<br>56% Male<br>Mean age 71.9 (±9.1)                                                                                                         | Apixaban vs Dabigatran<br>3,235 patients on Dabigatran<br>64% Male<br>Mean age 67.5 (±7.3)<br><br>Apixaban vs Rivaroxaban<br>3,676 patients on Rivaroxban<br>56% Male<br>Mean age 72.0 (±9.8)                                                                                                        | Stroke / SE<br>Major bleeding                                            | Apixaban vs Dabigatran:<br>Apixaban mean 210 days<br>Dabigatran mean 241 days<br><br>Apixaban vs Rivaroxaban<br>Apixaban mean 212 days<br>Rivaroxaban mean 201 days | =                                                                                                   |
| Bang, 2020, Korea 24<br><br>Retrospective with Inverse Probability of Treatment Weighting | 10,548 patients on Apixaban<br>Mean age 71.6<br>44% Female<br>Mean CHADSVACS 4.5<br>Mean HAS-BLED 3.5<br>Mean Charlson 4.3                                                                                                                                                                        | 8,648 patients on Warfarin<br>Mean age 71.6<br>44% Female<br>Mean CHA <sub>2</sub> DS <sub>2</sub> -VASC 4.5<br>Mean HAS-BLED 3.5<br>Mean Charlson 4.3                                                                                                                                               | Stroke / SE<br>Major bleeding<br>Intracranial haemorrhage<br>GI bleeding | Median 149 days Apixaban<br>Median 105 days Warfarin                                                                                                                | +                                                                                                   |
| Bradley, 2020, USA 52                                                                     | 55,038 patients on Apixaban<br>Mean age 71.3 (±9.7)                                                                                                                                                                                                                                               | 55,038 patients on Warfarin<br>Mean age 71.3 ±10.6                                                                                                                                                                                                                                                   | GI bleeding<br>Intracranial                                              | NR                                                                                                                                                                  | +                                                                                                   |

| First author, Year, country<br><br>Study design                                                                             | Apixaban<br><i>n</i> =participants<br>mean (±SD) Age (years)<br>% Female/Male<br>Charlson comorbidity index<br>CHA <sub>2</sub> DS <sub>2</sub> -VAsC score<br>HAS-BLED score                                             | Comparator(s)<br><i>n</i> =patients<br>mean (±SD) Age (years)<br>% Female/Male<br>Charlson comorbidity index<br>CHA <sub>2</sub> DS <sub>2</sub> -VAsC score<br>HAS-BLED score                                            | Outcomes                                                                                                              | Follow-up                                                                                        | Impact of Apixaban<br><br>+ Favours Apixaban<br>- Favours comparator<br>= No difference / uncertain |
|-----------------------------------------------------------------------------------------------------------------------------|---------------------------------------------------------------------------------------------------------------------------------------------------------------------------------------------------------------------------|---------------------------------------------------------------------------------------------------------------------------------------------------------------------------------------------------------------------------|-----------------------------------------------------------------------------------------------------------------------|--------------------------------------------------------------------------------------------------|-----------------------------------------------------------------------------------------------------|
| Retrospective with PSM                                                                                                      | 61% Male<br>Mean CHA <sub>2</sub> DS <sub>2</sub> -VASC 3.2 (±1.5)<br>Mean HAS-BLED 2.2 ±1.0                                                                                                                              | 61% Male<br>Mean CHA <sub>2</sub> DS <sub>2</sub> -VASC 3.2 ±1.5<br>Mean HAS-BLED 2.2 ±1.1                                                                                                                                | haemorrhage<br>Ischaemic stroke                                                                                       | Person years at risk<br>approximately 20,000 for Apixaban and 25,000 for Warfarin                |                                                                                                     |
| Chan, 2018, Taiwan 25<br><br>Retrospective with PSM (unmatched baseline data given as matched cohort <i>n</i> = not stated) | 5,843 patients on Apixaban<br>Mean age 76 (±10)<br>45% Female<br>Mean CHA <sub>2</sub> DS <sub>2</sub> -VASC 3.9 (±1.6)<br>Mean HAS-BLED 3.0 (±1.1)                                                                       | 19,375 patients on Warfarin<br>Mean age 76 (±10)<br>46% Female<br>Mean CHA <sub>2</sub> DS <sub>2</sub> -VASC 3.9 (±0.9)<br>Mean HAS-BLED 3.0 (±0.6)                                                                      | Ischaemic stroke / SE<br>Acute MI<br>All-cause mortality<br>Intracranial haemorrhage<br>GI bleeding<br>Major bleeding | Apixaban = 0.76 years<br><br>Warfarin = 1.47 years                                               | +                                                                                                   |
| Coleman, 2016, USA 65<br><br>Retrospective with PSM                                                                         | 4,083 patients on Apixaban<br>Mean age 71.0 (±11.3)<br>53% Male<br>Mean CHA <sub>2</sub> DS <sub>2</sub> -VASC 3.5 (±1.4)<br>Mean HAS-BLED 1.7 (±0.7)<br>Mean Charlson 1.1 (±1.1)                                         | 4,083 patients on Warfarin<br>Mean age 71.2 (±11.3)<br>54% Male<br>Mean CHA <sub>2</sub> DS <sub>2</sub> -VASC 3.5 (±1.4)<br>Mean HAS-BLED 1.7 (±0.7)<br>Mean Charlson 1.0 (±1.1)                                         | Intracranial haemorrhage<br>Ischaemic stroke<br>Combined ICH / IS                                                     | Mean follow-up not given<br><br>Apixaban = 2125 person-years<br><br>Warfarin = 1951 person-years | +                                                                                                   |
| Coleman, 2017, USA 66<br><br>Retrospective with PSM                                                                         | 1,257 AF patients on Apixaban with prior stroke/TIA<br>Median age 74 (IQR 63, 82)<br>Male 54%<br>Median CHA <sub>2</sub> DS <sub>2</sub> -VAsC 5 (IQR 4,6)<br>Median HAS-BLED 4 (IQR 4, 5)<br>Median Charlson 3 (IQR 3,4) | 1,257 AF patients on Warfarin with prior stroke/TIA<br>Median age 74 (IQR 63, 82)<br>Male 56%<br>Median CHA <sub>2</sub> DS <sub>2</sub> -VAsC 5 (IQR 4,6)<br>Median HAS-BLED 4 (IQR 4, 5)<br>Median Charlson 3 (IQR 3,4) | Ischaemic stroke<br>ICH<br>Major bleed                                                                                | 6-months                                                                                         | =                                                                                                   |
| Coleman, 2018, Germany 67                                                                                                   | 835 AF patients on Apixaban<br>Mean age 75.3 (±10.6)<br>50% Male                                                                                                                                                          | 835 AF patients on VKA<br>Mean age 74.8 (±9.2)<br>53% Male                                                                                                                                                                | Ischaemic stroke<br>TIA<br>MI                                                                                         | 12-months                                                                                        | =                                                                                                   |



| First author, Year, country<br><br>Study design                             | Apixaban<br><i>n</i> =participants<br>mean (±SD) Age (years)<br>% Female/Male<br>Charlson comorbidity index<br>CHA <sub>2</sub> DS <sub>2</sub> -VASc score<br>HAS-BLED score          | Comparator(s)<br><i>n</i> =patients<br>mean (±SD) Age (years)<br>% Female/Male<br>Charlson comorbidity index<br>CHA <sub>2</sub> DS <sub>2</sub> -VASc score<br>HAS-BLED score                                                                                                                                                                                                              | Outcomes                                                                                    | Follow-up | Impact of Apixaban<br><br>+ Favours Apixaban<br>- Favours comparator<br>= No difference / uncertain |
|-----------------------------------------------------------------------------|----------------------------------------------------------------------------------------------------------------------------------------------------------------------------------------|---------------------------------------------------------------------------------------------------------------------------------------------------------------------------------------------------------------------------------------------------------------------------------------------------------------------------------------------------------------------------------------------|---------------------------------------------------------------------------------------------|-----------|-----------------------------------------------------------------------------------------------------|
| Retrospective with PSM                                                      | Mean CHA <sub>2</sub> DS <sub>2</sub> -VASc 3.5 (±1.5)<br>>1 relevant co-morbidities 74%                                                                                               | Mean CHA <sub>2</sub> DS <sub>2</sub> -VASc 3.6 (±1.5)<br>≥1 relevant co-morbidities 78%                                                                                                                                                                                                                                                                                                    |                                                                                             |           |                                                                                                     |
| Deitelzweig, 2016, USA 68<br><br>Retrospective with multivariate regression | 4,138 AF patients on Apixaban<br>Mean age 73.6 (±11.6)<br>51% Female<br>Mean Charlson 2.1 (±1.2)<br>Mean CHA <sub>2</sub> DS <sub>2</sub> -VASc 3.7 (±1.6)<br>HAS-BLED mean 2.4 (±1.0) | 37,754 AF patients on rivaroxaban<br>Mean age 72.3 (±11.8)<br>49% Female<br>Mean Charlson 2.1 (±1.1)<br>Mean CHA <sub>2</sub> DS <sub>2</sub> -VASc 3.7 (±1.6)<br>Mean HAS-BLED 2.4 (±1.0)<br><br>32,838 AF patients on dabigatran<br>Mean age 71.9 (±11.8)<br>46% Female<br>Mean Charlson 2.1 (±1.9)<br>Mean CHA <sub>2</sub> DS <sub>2</sub> -VASc 3.7 (±1.6)<br>Mean HAS-BLED 2.3 (±1.0) | Bleeding-related hospital readmission<br>All-cause hospital readmission                     | 1-month   | +                                                                                                   |
| Deitelzweig, 2017, USA 69<br><br>Retrospective with PSM                     | 6,810 AF patients on Apixaban<br>Mean age 77.1 (±8.0)<br>48% Female<br>Mean Charlson 2.8 (±2.3)<br>Mean CHA <sub>2</sub> DS <sub>2</sub> -VASc 4.4 (±1.6)<br>Mean HAS-BLED 2.9 (±1.1)  | Apixaban vs Rivaroxaban<br>After PSM, 6,810 AF patients were in each cohort. Mean ages (77.1 vs. 77.0 years), Charlson (2.8 vs. 2.7), CHA <sub>2</sub> DS <sub>2</sub> -VASc (4.4 vs. 4.4), HAS-BLED (2.9 vs. 2.9).<br><br>Apixaban vs Dabigatran<br>After PSM, 2,327 AF patients were in each cohort. Mean ages (77.3 vs. 76.9 years), Charlson                                            | Stroke/SE<br>Ischaemic stroke<br>Haemorrhagic stroke<br>SE<br>Major bleeding<br>GI bleeding | 6-months  | +                                                                                                   |

| First author, Year, country<br><br>Study design                                           | Apixaban<br><i>n</i> =participants<br>mean (±SD) Age (years)<br>% Female/Male<br>Charlson comorbidity index<br>CHA <sub>2</sub> DS <sub>2</sub> -VAsC score<br>HAS-BLED score | Comparator(s)<br><i>n</i> =patients<br>mean (±SD) Age (years)<br>% Female/Male<br>Charlson comorbidity index<br>CHA <sub>2</sub> DS <sub>2</sub> -VAsC score<br>HAS-BLED score                                                                                                                                       | Outcomes                                                                                                      | Follow-up                                                                                                                        | Impact of Apixaban<br><br>+ Favours Apixaban<br>- Favours comparator<br>= No difference / uncertain |
|-------------------------------------------------------------------------------------------|-------------------------------------------------------------------------------------------------------------------------------------------------------------------------------|----------------------------------------------------------------------------------------------------------------------------------------------------------------------------------------------------------------------------------------------------------------------------------------------------------------------|---------------------------------------------------------------------------------------------------------------|----------------------------------------------------------------------------------------------------------------------------------|-----------------------------------------------------------------------------------------------------|
|                                                                                           |                                                                                                                                                                               | (2.6 vs. 2.6), CHA <sub>2</sub> DS <sub>2</sub> -VAsC (4.6 vs. 4.3), HAS-BLED (2.9 vs. 2.9).<br><br>Apixaban vs Warfarin<br>After PSM, 7,107 AF patients were in each cohort. Mean ages (78.2 vs. 78.1 years), Charlson (3.0 vs. 3.0), CHA <sub>2</sub> DS <sub>2</sub> -VAsC (4.6 vs. 4.6), HAS-BLED (3.0 vs. 3.1). |                                                                                                               |                                                                                                                                  |                                                                                                     |
| Durand, 2020, Canada, USA, UK 70<br><br>Retrospective with PSM                            | Apixaban Vs Dabigatran<br>49,058 pairs<br>Mean age 75.3<br>54% Male<br><br>Apixaban Vs Rivaroxaban<br>54,276 pairs<br>Mean age 75.5<br>54% Male                               | NA                                                                                                                                                                                                                                                                                                                   | Ischaemic stroke or SE<br>Major bleeding<br>MI<br>Intracranial bleeding<br>GI bleeding<br>All-cause mortality | 12-months                                                                                                                        | +                                                                                                   |
| Fralick, 2020, USA 42<br><br>Retrospective with PSM                                       | 39,351 AF patients on Apixaban<br>Mean age 69.4 (±10.5)<br>40% Female                                                                                                         | 39,351 AF patients on Rivaroxaban<br>Mean age 69.3 (±10.6)<br>40% Female                                                                                                                                                                                                                                             | Stroke<br>SE<br>GI bleeding<br>ICH                                                                            | Apixaban = Mean follow-up 288 days<br>Rivaroxaban = Mean follow-up 291 days                                                      | +                                                                                                   |
| Graham, 2019, USA 26<br><br>Retrospective with Inverse Probability of Treatment Weighting | 72,921 AF patients on Apixaban<br>Mean age 75.1<br>47% Female<br>80% had CHA <sub>2</sub> DS <sub>2</sub> -VAsC ≥3<br>45% had HAS-BLED ≥3                                     | 183,003 AF patients on Warfarin<br>Mean age 75.2<br>47% Female<br>80% had CHA <sub>2</sub> DS <sub>2</sub> -VAsC ≥3<br>45% had HAS-BLED ≥3                                                                                                                                                                           | Thromboembolic stroke<br>ICH<br>All-cause mortality                                                           | A total of 448,944 anticoagulant initiators contributed 159,927 person-years of on-treatment follow-up (mean duration 130 days). | +                                                                                                   |

| First author, Year, country<br><br>Study design                                   | Apixaban<br><i>n</i> =participants<br>mean (±SD) Age (years)<br>% Female/Male<br>Charlson comorbidity index<br>CHA <sub>2</sub> DS <sub>2</sub> -VASc score<br>HAS-BLED score | Comparator(s)<br><i>n</i> =patients<br>mean (±SD) Age (years)<br>% Female/Male<br>Charlson comorbidity index<br>CHA <sub>2</sub> DS <sub>2</sub> -VASc score<br>HAS-BLED score                                                                                                                         | Outcomes                                                                              | Follow-up                                                                                  | Impact of Apixaban<br><br>+ Favours Apixaban<br>- Favours comparator<br>= No difference / uncertain |
|-----------------------------------------------------------------------------------|-------------------------------------------------------------------------------------------------------------------------------------------------------------------------------|--------------------------------------------------------------------------------------------------------------------------------------------------------------------------------------------------------------------------------------------------------------------------------------------------------|---------------------------------------------------------------------------------------|--------------------------------------------------------------------------------------------|-----------------------------------------------------------------------------------------------------|
|                                                                                   |                                                                                                                                                                               | <p>86,293 AF patients on Dabigatran<br/>Mean age 75.1<br/>47% Female<br/>80% had CHA<sub>2</sub>DS<sub>2</sub>-VASc ≥3<br/>45% had HAS-BLED ≥3</p> <p>106,369 AF patients on Dabigatran<br/>Mean age 75.1<br/>47% Female<br/>81% had CHA<sub>2</sub>DS<sub>2</sub>-VASc ≥3<br/>45% had HAS-BLED ≥3</p> |                                                                                       |                                                                                            |                                                                                                     |
| Granger, 2011, International (39 countries) <sup>13</sup><br><br>Double blind RCT | 9,120 AF patients on Apixaban<br>Median age 70 (IQR 63-76)<br>36% Female                                                                                                      | 9,081 AF patients on Warfarin<br>Median age 70 (IQR 63-76)<br>35% Female                                                                                                                                                                                                                               | Stroke<br>Haemorrhagic stroke<br>SE<br>All-cause mortality                            | 1.8 years                                                                                  | +                                                                                                   |
| Gupta, 2019, USA 71<br><br>Retrospective with PSM                                 | 7,607 AF patients on Apixaban<br>Mean age 76.5 (±9.5)<br>58% Male<br>Charlson 2.5 (±2.4)<br>CHA <sub>2</sub> DS <sub>2</sub> -VASc 4.2 (±1.8)<br>HAS-BLED 3.0 (±1.3)          | 7,607 AF patients on Warfarin<br>Mean age 76.6 (±9.8)<br>58% Male<br>Charlson 2.5 (±2.4)<br>CHA <sub>2</sub> DS <sub>2</sub> -VASc 4.1 (±1.8)<br>HAS-BLED 3.0 (±1.3)                                                                                                                                   | Ischaemic stroke<br>Haemorrhagic stroke<br>SE<br>Major bleeding<br>GI Bleeding<br>ICH | Apixaban = 161 days<br>Warfarin = 153 days<br><br>Results given as incidence rates /100 PY | +                                                                                                   |
| Halvorsen, 2017, Norway 72                                                        | 6,506 AF patients on Apixaban<br>Mean age 74.5<br>55% Male<br>≥1 comorbidity 60%                                                                                              | 11,427 AF patients on Warfarin<br>Mean age 74.6<br>59% Male<br>≥1 comorbidity 66%                                                                                                                                                                                                                      | Major bleed<br>Clinically relevant non-major bleed                                    | Mean follow-up of 173 days                                                                 | +                                                                                                   |

| First author, Year, country<br><br>Study design                    | Apixaban<br><i>n</i> =participants<br>mean (±SD) Age (years)<br>% Female/Male<br>Charlson comorbidity index<br>CHA <sub>2</sub> DS <sub>2</sub> -VAsC score<br>HAS-BLED score | Comparator(s)<br><i>n</i> =patients<br>mean (±SD) Age (years)<br>% Female/Male<br>Charlson comorbidity index<br>CHA <sub>2</sub> DS <sub>2</sub> -VAsC score<br>HAS-BLED score                                                                                                                                                                                                                                                                                 | Outcomes                                                                                              | Follow-up                                                                                     | Impact of Apixaban<br><br>+ Favours Apixaban<br>- Favours comparator<br>= No difference / uncertain |
|--------------------------------------------------------------------|-------------------------------------------------------------------------------------------------------------------------------------------------------------------------------|----------------------------------------------------------------------------------------------------------------------------------------------------------------------------------------------------------------------------------------------------------------------------------------------------------------------------------------------------------------------------------------------------------------------------------------------------------------|-------------------------------------------------------------------------------------------------------|-----------------------------------------------------------------------------------------------|-----------------------------------------------------------------------------------------------------|
| Prospective cohort study                                           | CHA <sub>2</sub> DS <sub>2</sub> -VAsC 2.9<br>HAS-BLED ≥3 47%                                                                                                                 | CHA <sub>2</sub> DS <sub>2</sub> -VAsC 3.1<br>HAS-BLED >3 43%                                                                                                                                                                                                                                                                                                                                                                                                  | GI bleed<br>ICH                                                                                       |                                                                                               |                                                                                                     |
| Hernandez, 2017, USA 73<br><br>Retrospective                       | 2,358 AF patients on Apixaban<br>Mean age 77.4 ±8.6<br>43% Male<br>CHA <sub>2</sub> DS <sub>2</sub> -VAsC 4.7 (±1.7)<br>HAS-BLED 3.7 (±0.9)                                   | 12,353 AF patients on Warfarin<br>Mean age 78.0 (±11.0)<br>41% Male<br>CHA <sub>2</sub> DS <sub>2</sub> -VAsC 4.8 (±1.9)<br>HAS-BLED 3.8 (±1.0)<br><br>1,415 AF patients on Dabigatran<br>Mean age 74.9 (±8.7)<br>47% Male<br>CHA <sub>2</sub> DS <sub>2</sub> -VAsC 4.3 (±1.7)<br>HAS-BLED 3.5 (±0.9)<br><br>5,139 AF patients on Rivaroxaban<br>Mean age 76.4 (±8.6)<br>44% Male<br>CHA <sub>2</sub> DS <sub>2</sub> -VAsC 4.6 (±1.8)<br>HAS-BLED 3.7 (±1.0) | Ischaemic stroke<br>All-cause mortality<br>Any bleeding event<br>Intracranial bleeding<br>GI bleeding | Apixaban = 185 days<br>Dabigatran = 294 days<br>Rivaroxaban = 255 days<br>Warfarin = 274 days | +                                                                                                   |
| Hohnloser, 2017, Germany 27<br><br>Retrospective with adjusted HRs | 3,633 AF patients on Apixaban<br>Mean age 75.5 (±10.8)<br>49% Male<br>Carlson 3.4 (±2.7)<br>CHA <sub>2</sub> DS <sub>2</sub> -VAsC 4.1 (±1.8)<br>HAS-BLED 2.9 (±1.2)          | 16,179 AF patients on Phenprocoumon<br>Mean age 76.1 (±9.1)<br>50% Male<br>Carlson 3.4 (±2.6)<br>CHA <sub>2</sub> DS <sub>2</sub> -VAsC 4.1 (±1.6)<br>HAS-BLED 2.7 (±1.1)                                                                                                                                                                                                                                                                                      | Major bleeding<br>GI bleeding<br>Any bleeding                                                         | Mean Apixaban follow-up 218 days<br>Mean Phenprocoumon follow-up 280 days                     | +                                                                                                   |
| Hohnloser, 2018, Germany 74                                        | 10,117 AF patients on Apixaban<br>Mean age 74.5 (±11.4) years                                                                                                                 | 23,823 AF patients on Phenprocoumon                                                                                                                                                                                                                                                                                                                                                                                                                            | Stroke                                                                                                | Phenprocoumon = 362 days                                                                      | +                                                                                                   |

| First author, Year, country<br><br>Study design               | Apixaban<br>n=participants<br>mean (±SD) Age (years)<br>% Female/Male<br>Charlson comorbidity index<br>CHA <sub>2</sub> DS <sub>2</sub> -VASc score<br>HAS-BLED score | Comparator(s)<br>n=patients<br>mean (±SD) Age (years)<br>% Female/Male<br>Charlson comorbidity index<br>CHA <sub>2</sub> DS <sub>2</sub> -VASc score<br>HAS-BLED score                                                                                                                                                                                                                                                                                                                                               | Outcomes                                                                                                                 | Follow-up                                                              | Impact of Apixaban<br><br>+ Favours Apixaban<br>- Favours comparator<br>= No difference / uncertain |
|---------------------------------------------------------------|-----------------------------------------------------------------------------------------------------------------------------------------------------------------------|----------------------------------------------------------------------------------------------------------------------------------------------------------------------------------------------------------------------------------------------------------------------------------------------------------------------------------------------------------------------------------------------------------------------------------------------------------------------------------------------------------------------|--------------------------------------------------------------------------------------------------------------------------|------------------------------------------------------------------------|-----------------------------------------------------------------------------------------------------|
| Retrospective with adjusted HRs                               | 51% Male<br>Charlson 3.4 (±2.7)<br>CHA <sub>2</sub> DS <sub>2</sub> -VASc 4.0 (±1.8)<br>HAS-BLED 2.8 (±1.2)                                                           | Mean age 75.2 (±9.5) years<br>53% Male<br>Charlson 3.4 (±2.6)<br>CHA <sub>2</sub> DS <sub>2</sub> -VASc 4.0 (±1.6)<br>HAS-BLED 2.8 (±1.1)<br><br>5,122 AF patients on Dabigatran<br>Mean age 71.7 (±11.6) years<br>55% Male<br>Charlson 2.9 (±2.5)<br>CHA <sub>2</sub> DS <sub>2</sub> -VASc 3.7 (±1.8)<br>HAS-BLED 2.6 (±1.2)<br><br>22,143 AF patients on Rivaroxaban<br>Mean age 72.1 (11.8) years<br>55% Male<br>Charlson 2.9 (±2.5)<br>CHA <sub>2</sub> DS <sub>2</sub> -VASc 3.5 (±1.8)<br>HAS-BLED 2.5 (±1.2) | Ischaemic stroke<br>Haemorrhagic stroke<br>All-cause mortality<br>Major bleeding<br>Intracranial bleeding<br>GI bleeding | Apixaban = 306<br>Dabigatran = 339 days<br>Rivaroxaban = 340 days      |                                                                                                     |
| Huybrechts, 2020, USA 53<br><br>Retrospective Cohort with PSM | 19,588 AF patients on Apixaban<br><br>Characteristics not given as this was a secondary outcome                                                                       | 19,588 patients on Warfarin<br><br>Characteristics not given as this was a secondary outcome                                                                                                                                                                                                                                                                                                                                                                                                                         | Stroke<br>Major haemorrhage                                                                                              | 5 years                                                                | +                                                                                                   |
| Jansson, 2020, Sweden 39                                      | 11,493 AF patients on Apixaban<br>Mean age 73.5 (±10.3)<br>57% Male                                                                                                   | 6,453 AF patients on Dabigatran<br>Mean age 72.3 (±9.8)<br>58% Male                                                                                                                                                                                                                                                                                                                                                                                                                                                  | Ischaemic stroke<br>Combined all cause stroke + SE<br>Myocardial infarction                                              | Apixaban - Median 205 days (IQR 83-381)<br><br>Dabigatran - Median 352 | =                                                                                                   |

| First author, Year, country<br><br>Study design              | Apixaban<br><i>n</i> =participants<br>mean (±SD) Age (years)<br>% Female/Male<br>Charlson comorbidity index<br>CHA <sub>2</sub> DS <sub>2</sub> -VAsC score<br>HAS-BLED score | Comparator(s)<br><i>n</i> =patients<br>mean (±SD) Age (years)<br>% Female/Male<br>Charlson comorbidity index<br>CHA <sub>2</sub> DS <sub>2</sub> -VAsC score<br>HAS-BLED score | Outcomes                                                                                                                                                                      | Follow-up                                                                                             | Impact of Apixaban<br><br>+ Favours Apixaban<br>- Favours comparator<br>= No difference / uncertain |
|--------------------------------------------------------------|-------------------------------------------------------------------------------------------------------------------------------------------------------------------------------|--------------------------------------------------------------------------------------------------------------------------------------------------------------------------------|-------------------------------------------------------------------------------------------------------------------------------------------------------------------------------|-------------------------------------------------------------------------------------------------------|-----------------------------------------------------------------------------------------------------|
| Retrospective Cohort with full optimal matching              |                                                                                                                                                                               | 7,897 AF patients on Rivaroxaban<br>Mean age 73.5 ± 10.3<br>57% Male                                                                                                           | All-cause mortality<br>Haemorrhagic stroke<br>Major bleeding                                                                                                                  | days (IQR 111-750)<br><br>Rivaroxaban - Median 267 (IQR 102-532)                                      |                                                                                                     |
| Kjerpeseth, 2019, Norway 28<br><br>Retrospective Cohort      | 10,550 AF patients on Apixaban<br>Mean age 74.2 (±11.0)<br>46% Female<br>Mean CHA <sub>2</sub> DS <sub>2</sub> -VAsC 3.5 (±1.7)<br>Mean HAS-BLED 2.5 (±1.1)                   | 6,435 AF patients on Warfarin<br>Mean age 73.6 (±11.9)<br>41% Female<br>Mean CHA <sub>2</sub> DS <sub>2</sub> -VAsC 3.5 (± 1.8)<br>Mean HAS-BLED 2.6 (±1.2)                    | Ischaemic stroke, TIA or SE<br>Ischaemic stroke or SE<br>Ischaemic stroke<br>TIA<br>Major (or clinically relevant non-major) bleeding<br>Intracranial bleeding<br>GI bleeding | 365 days or censored at change of treatment                                                           | +                                                                                                   |
| Kohsaka, 2017, Japan 29<br><br>Retrospective cohort with PSM | 5,977 AF patients on Apixaban<br>Mean age 77.4 (±10)<br>41% Female<br>Mean CHA <sub>2</sub> DS <sub>2</sub> -VAsC 3.5 (±1.6)                                                  | 5,977 AF patients on Warfarin<br>Mean age 77.7 (±10)<br>41% Female<br>Mean CHA <sub>2</sub> DS <sub>2</sub> -VAsC 3.5 (±1.5)                                                   | Major bleeding<br><br>Any bleeding                                                                                                                                            | Results given as rate per 100 patient-years only given.<br><br>Average follow-up per group NR.        | +                                                                                                   |
| Kohsaka, 2018, Japan 75<br><br>Retrospective cohort with PSM | 11,972 AF patients on Apixaban<br>Mean age 77.6 (±10.0)<br>42% Female<br>Mean CHA <sub>2</sub> DS <sub>2</sub> -VAsC 3.4 (±1.6)                                               | 11,972 AF patients on Warfarin<br>Mean age 77.7 (±10.0)<br>42% Female<br>Mean CHA <sub>2</sub> DS <sub>2</sub> -VAsC 3.4 (±1.5)                                                | Major bleeding<br>Any bleeding<br>Stroke or SE                                                                                                                                | Apixaban = 123 days<br>Warfarin = 110 days                                                            | +                                                                                                   |
| Lamberts, 2017, Denmark 49                                   | 7,963 AF patients on Apixaban<br>Mean age 75.4 (±11.1)<br>51% Male                                                                                                            | 6,715 AF patients on Rivaroxaban<br>Mean age 74.4 (± 11.0)<br>52% Male                                                                                                         | Major bleeding (total)<br>Major bleeding (30 day)                                                                                                                             | Apixaban = 268.1 days<br>Rivaroxaban = 348.5 days<br>Dabigatran = 511.4 days<br>Warfarin = 398.0 days | +                                                                                                   |

| First author, Year, country<br><br>Study design                                                      | Apixaban<br><i>n</i> =participants<br>mean (±SD) Age (years)<br>% Female/Male<br>Charlson comorbidity index<br>CHA <sub>2</sub> DS <sub>2</sub> -VASC score<br>HAS-BLED score                                  | Comparator(s)<br><i>n</i> =patients<br>mean (±SD) Age (years)<br>% Female/Male<br>Charlson comorbidity index<br>CHA <sub>2</sub> DS <sub>2</sub> -VASC score<br>HAS-BLED score                                                                                                                                                                                                                                         | Outcomes                                                                                                                     | Follow-up                                                                                                                      | Impact of Apixaban<br><br>+ Favours Apixaban<br>- Favours comparator<br>= No difference / uncertain |
|------------------------------------------------------------------------------------------------------|----------------------------------------------------------------------------------------------------------------------------------------------------------------------------------------------------------------|------------------------------------------------------------------------------------------------------------------------------------------------------------------------------------------------------------------------------------------------------------------------------------------------------------------------------------------------------------------------------------------------------------------------|------------------------------------------------------------------------------------------------------------------------------|--------------------------------------------------------------------------------------------------------------------------------|-----------------------------------------------------------------------------------------------------|
| Retrospective cohort with adjusted HRs                                                               | Mean CHA <sub>2</sub> DS <sub>2</sub> -VASC 3.2 (±1.6)<br>Mean HAS-BLED 2.3 (±1.2)                                                                                                                             | Mean CHA <sub>2</sub> DS <sub>2</sub> -VASC 3.0 (±1.6)<br>Mean HAS-BLED 2.2 (±1.2)<br><br>15,413 AF patients on Dabigatran<br>Mean age 71.5 (±11.0)<br>57% Male<br>Mean CHA <sub>2</sub> DS <sub>2</sub> -VASC 2.7 (±1.6)<br>Mean HAS-BLED 2.1 (±1.2)<br><br>24,230 AF patients on Warfarin<br>Mean age 72.1 (±11.3)<br>58% Male<br>Mean CHA <sub>2</sub> DS <sub>2</sub> -VASC 2.9 (±1.7)<br>Mean HAS-BLED 2.2 (±1.2) |                                                                                                                              | Overall mean = 403 days                                                                                                        |                                                                                                     |
| Larsen, 2016, Denmark 30<br><br>Retrospective cohort with Inverse Probability of Treatment Weighting | 6,349 AF patients on Apixaban<br>Median age 71.3 (IQR 65.8 - 77.2)<br>40% Female<br>Mean CHA <sub>2</sub> DS <sub>2</sub> -VASC 2.8 (±1.6)<br>Mean HAS-BLED 2.3 (±1.2)                                         | 35,436 AF patients on Warfarin<br>Median age 70.9 (IQR 64.3 - 77.7)<br>40% Female<br>Mean CHA <sub>2</sub> DS <sub>2</sub> -VASC 2.7 (±1.6)<br>Mean HAS-BLED 2.2 (±1.2)                                                                                                                                                                                                                                                | Ischaemic stroke or SE<br>Ischaemic stroke<br>All-cause mortality<br>Any bleeding<br>Major bleeding<br>Intracranial bleeding | 1 year                                                                                                                         | +                                                                                                   |
| Lee, 2019, Korea 23<br><br>Retrospective cohort with Inverse Probability of Treatment Weighting      | Apixaban vs Warfarin:<br>22,177 AF patients on Apixaban<br>Mean age 70.9 (±11.0)<br>56% Male<br>Mean CHA <sub>2</sub> DS <sub>2</sub> -VASC 3.6 (±1.4)<br>Mean HAS-BLED 2.7 (±1.1)<br>Mean Charlson 3.8 (±2.3) | Apixaban vs Warfarin:<br>25,420 AF patients on Warfarin<br>Mean age 71.2 (±11.1)<br>55% Male<br>Mean CHA <sub>2</sub> DS <sub>2</sub> -VASC 3.6 (±1.6)<br>Mean HAS-BLED 2.7 (±1.1)<br>Mean Charlson 3.82 ± 2.39                                                                                                                                                                                                        | Ischaemic stroke<br>Intracranial haemorrhage<br>GI bleeding<br>Major bleeding                                                | Apixaban = 0.80 years<br>Rivaroxaban = 0.87 years<br>Dabigatran = 0.87 years<br>Edoxaban = 0.57 years<br>Warfarin = 0.82 years | +                                                                                                   |

| First author, Year, country<br><br>Study design | Apixaban<br>n=participants<br>mean (±SD) Age (years)<br>% Female/Male<br>Charlson comorbidity index<br>CHA <sub>2</sub> DS <sub>2</sub> -VASc score<br>HAS-BLED score                                                                                                                                                                                                                                                                                                                                                                                                                                                                                                         | Comparator(s)<br>n=patients<br>mean (±SD) Age (years)<br>% Female/Male<br>Charlson comorbidity index<br>CHA <sub>2</sub> DS <sub>2</sub> -VASc score<br>HAS-BLED score                                                                                                                                                                                                                                                                                                                                                                                                                                                                                                             | Outcomes | Follow-up | Impact of Apixaban<br><br>+ Favours Apixaban<br>- Favours comparator<br>= No difference / uncertain |
|-------------------------------------------------|-------------------------------------------------------------------------------------------------------------------------------------------------------------------------------------------------------------------------------------------------------------------------------------------------------------------------------------------------------------------------------------------------------------------------------------------------------------------------------------------------------------------------------------------------------------------------------------------------------------------------------------------------------------------------------|------------------------------------------------------------------------------------------------------------------------------------------------------------------------------------------------------------------------------------------------------------------------------------------------------------------------------------------------------------------------------------------------------------------------------------------------------------------------------------------------------------------------------------------------------------------------------------------------------------------------------------------------------------------------------------|----------|-----------|-----------------------------------------------------------------------------------------------------|
|                                                 | <p>Apixaban vs Rivaroxaban:<br/>22,177 AF patients on Apixaban<br/>Mean age 72.3 (±10.1)<br/>53% Male<br/>Mean CHA<sub>2</sub>DS<sub>2</sub>-VASC 3.7 (±1.4)<br/>Mean HAS-BLED 2.8 (±1.0)<br/>Mean Charlson 3.8 (±2.3)</p> <p>Apixaban vs Dabigatran:<br/>22,177 AF patients on Apixaban<br/>Mean age 71.8 (±10.3)<br/>54% Male<br/>Mean CHA<sub>2</sub>DS<sub>2</sub>-VASC 3.7 (±1.4)<br/>Mean HAS-BLED 2.7 (±1.03)<br/>Mean Charlson 3.8 (±2.3)</p> <p>Apixaban vs Edoxaban:<br/>22,177 AF patients on Apixaban<br/>Mean age 72.3 (±10.3)<br/>53% Male<br/>Mean CHA<sub>2</sub>DS<sub>2</sub>-VASC 3.7 (±1.4)<br/>Mean HAS-BLED 2.7 (±1.0)<br/>Mean Charlson 3.8 (±2.3)</p> | <p>Apixaban vs Rivaroxaban:<br/>35,965 AF patients on Rivaroxaban<br/>Mean age 72.3 (±10.0)<br/>53% Male<br/>Mean CHA<sub>2</sub>DS<sub>2</sub>-VASC 3.7 (±1.4)<br/>Mean HAS-BLED 2.8 (±1.0)<br/>Mean Charlson 3.8 (±2.3)</p> <p>Apixaban vs Dabigatran:<br/>17,745 AF patients on Dabigatran<br/>Mean age 71.8 (±9.9)<br/>54% Male<br/>Mean CHA<sub>2</sub>DS<sub>2</sub>-VASC 3.7 (±1.38)<br/>Mean HAS-BLED 2.71 ± 1.02<br/>Mean Charlson 3.8 (±2.3)</p> <p>Apixaban vs Edoxaban:<br/>15,496 AF patients on Edoxaban<br/>Mean age 72.3 (±9.8)<br/>53% Male<br/>Mean CHA<sub>2</sub>DS<sub>2</sub>-VASC 3.7 (±1.40)<br/>Mean HAS-BLED 2.7 (±1.0)<br/>Mean Charlson 3.8 (±2.4)</p> |          |           |                                                                                                     |



| First author, Year, country<br><br>Study design        | Apixaban<br><i>n</i> =participants<br>mean (±SD) Age (years)<br>% Female/Male<br>Charlson comorbidity index<br>CHA <sub>2</sub> DS <sub>2</sub> -VASC score<br>HAS-BLED score                                                                                                                                                                                                                                                                                                                                                              | Comparator(s)<br><i>n</i> =patients<br>mean (±SD) Age (years)<br>% Female/Male<br>Charlson comorbidity index<br>CHA <sub>2</sub> DS <sub>2</sub> -VASC score<br>HAS-BLED score                                                                                                                                                                                                                                                                                                                                                    | Outcomes                                                                                                                                    | Follow-up                                                                                                                                                                                                                                                            | Impact of Apixaban<br><br>+ Favours Apixaban<br>- Favours comparator<br>= No difference / uncertain |
|--------------------------------------------------------|--------------------------------------------------------------------------------------------------------------------------------------------------------------------------------------------------------------------------------------------------------------------------------------------------------------------------------------------------------------------------------------------------------------------------------------------------------------------------------------------------------------------------------------------|-----------------------------------------------------------------------------------------------------------------------------------------------------------------------------------------------------------------------------------------------------------------------------------------------------------------------------------------------------------------------------------------------------------------------------------------------------------------------------------------------------------------------------------|---------------------------------------------------------------------------------------------------------------------------------------------|----------------------------------------------------------------------------------------------------------------------------------------------------------------------------------------------------------------------------------------------------------------------|-----------------------------------------------------------------------------------------------------|
| Li, 2017, USA 31<br><br>Retrospective cohort with PSM  | 38,470 AF patients on Apixaban<br>Mean age 70.9 (±12.0)<br>40% Female<br>Mean CHA <sub>2</sub> DS <sub>2</sub> -VASC 3.2 (±1.8)<br>Mean HAS-BLED 2.6 (±1.4)<br>Mean Charlson 2.5 (±2.4)                                                                                                                                                                                                                                                                                                                                                    | 38,470 AF patients on Warfarin<br>Mean age 70.9 (±11.9)<br>40% Female<br>Mean CHA <sub>2</sub> DS <sub>2</sub> -VASC 3.2 (±1.7)<br>Mean HAS-BLED 2.6 (±1.3)<br>Mean Charlson 2.5 (±2.5)                                                                                                                                                                                                                                                                                                                                           | Stroke / SE<br>Ischaemic stroke<br>Haemorrhagic stroke<br>SE<br>Major bleeding<br>Intracranial haemorrhage<br>GI bleeding<br>Other bleeding | Apixaban = 179 days<br>Warfarin = 200 days                                                                                                                                                                                                                           | +                                                                                                   |
| Lin, 2017, USA 19<br><br>Retrospective cohort with PSM | Apixaban vs Rivaroxaban<br>4,062 AF patients on Apixaban<br>Mean age 62.0 (±8.5)<br>29% Female<br>Mean CHA <sub>2</sub> DS <sub>2</sub> -VASC 2.1 (±1.4)<br>Mean HAS-BLED 2.2 (±0.9)<br>Mean Charlson 1.2 (±1.6)<br><br>Apixaban vs Dabigatran<br>2,684 AF patients on Apixaban<br>Mean age 63.0 (±9.2)<br>28% Female<br>Mean CHA <sub>2</sub> DS <sub>2</sub> -VASC 2.1 (±1.5)<br>Mean HAS-BLED 2.1 (±0.9)<br>Mean Charlson 1.2 (±1.6)<br><br>Apixaban vs Warfarin<br>4,847 AF patients on Apixaban<br>Mean age 63.9 (±9.5)<br>32% Female | Apixaban vs Rivaroxaban<br>4,062 AF patients on Rivaroxaban<br>Mean age 62.0 (±8.4)<br>30% Female<br>Mean CHA <sub>2</sub> DS <sub>2</sub> -VASC 2.1 (±1.4)<br>Mean HAS-BLED 2.2 (±0.9)<br>Mean Charlson 1.2 (±1.6)<br><br>Apixaban vs Dabigatran<br>2,684 AF patients on Dabigatran<br>Mean age 63.0 (±9.3)<br>28% Female<br>Mean CHA <sub>2</sub> DS <sub>2</sub> -VASC 2.1 (±1.5)<br>Mean HAS-BLED 2.1 (±0.9)<br>Mean Charlson 1.2 (±1.6)<br><br>Apixaban vs Warfarin<br>4,847 AF patients on Warfarin<br>Mean age 64.0 (±9.4) | 1) Hospitalisations<br><br>2) Major bleeding                                                                                                | Matched cohorts (mean months ± SD)<br><br>Apixaban vs Rivaroxaban<br>Apixaban 4.5 ± 4.3<br>Rivaroxaban 4.5 ± 4.5<br><br>Apixaban vs Dabigatran<br>Apixaban 5.2 ± 5.1<br>Dabigatran 5.0 ± 5.2<br><br>Apixaban vs Warfarin<br>Apixaban 4.9 ± 4.9<br>Warfarin 4.8 ± 4.8 | +                                                                                                   |

| First author, Year, country<br><br>Study design         | Apixaban<br><i>n</i> =participants<br>mean (±SD) Age (years)<br>% Female/Male<br>Charlson comorbidity index<br>CHA <sub>2</sub> DS <sub>2</sub> -VASC score<br>HAS-BLED score                                                                                                                                                                                                                                                                                                                                                                                                                                                                                                          | Comparator(s)<br><i>n</i> =patients<br>mean (±SD) Age (years)<br>% Female/Male<br>Charlson comorbidity index<br>CHA <sub>2</sub> DS <sub>2</sub> -VASC score<br>HAS-BLED score                                                                                                                                                                                                                                                                                                                                                                                                                                                                                                                | Outcomes                                 | Follow-up                                                                                                                                                                                                                                                             | Impact of Apixaban<br><br>+ Favours Apixaban<br>- Favours comparator<br>= No difference / uncertain |
|---------------------------------------------------------|----------------------------------------------------------------------------------------------------------------------------------------------------------------------------------------------------------------------------------------------------------------------------------------------------------------------------------------------------------------------------------------------------------------------------------------------------------------------------------------------------------------------------------------------------------------------------------------------------------------------------------------------------------------------------------------|-----------------------------------------------------------------------------------------------------------------------------------------------------------------------------------------------------------------------------------------------------------------------------------------------------------------------------------------------------------------------------------------------------------------------------------------------------------------------------------------------------------------------------------------------------------------------------------------------------------------------------------------------------------------------------------------------|------------------------------------------|-----------------------------------------------------------------------------------------------------------------------------------------------------------------------------------------------------------------------------------------------------------------------|-----------------------------------------------------------------------------------------------------|
|                                                         | Mean CHA <sub>2</sub> DS <sub>2</sub> -VASC 2.3 (±1.6)<br>Mean HAS-BLED 2.2 (±1.0)<br>Mean Charlson 1.4 (±1.8)                                                                                                                                                                                                                                                                                                                                                                                                                                                                                                                                                                         | 31% Female<br>Mean CHA <sub>2</sub> DS <sub>2</sub> -VASC 2.3 (±1.7)<br>Mean HAS-BLED 2.2 (±1.1)<br>Mean Charlson 1.4 (±1.8)                                                                                                                                                                                                                                                                                                                                                                                                                                                                                                                                                                  |                                          |                                                                                                                                                                                                                                                                       |                                                                                                     |
| Lip, 2016a, USA 32<br><br>Retrospective Cohort with PSM | <p>vs Warfarin cohort:<br/>6,964 AF patients on Apixaban<br/>Mean age 69.1 (±12.3)<br/>39% Female<br/>Mean CHA<sub>2</sub>DS<sub>2</sub>-VASC 2.9 (±1.7)<br/>Mean HAS-BLED 2.2 (±1.3)<br/>Mean Deyo-Charlson 1.9 (±2.0)</p> <p>vs Dabigatran cohort:<br/>4,407 AF patients on Apixaban<br/>Mean age 67 (±12.3)<br/>36% Female<br/>Mean CHA<sub>2</sub>DS<sub>2</sub>-VASC 2.5 (±1.6)<br/>Mean HAS-BLED 2.0 (±1.2)<br/>Mean Deyo-Charlson 1.6 (±1.9)</p> <p>vs Rivaroxaban cohort:<br/>7,399 AF patients on Apixaban<br/>Mean age 68.4 (±12.4)<br/>39% Female<br/>Mean CHA<sub>2</sub>DS<sub>2</sub>-VASC 2.8 (±1.6)<br/>Mean HAS-BLED 2.2 (±1.2)<br/>Mean Deyo-Charlson 1.8 (±2.0)</p> | <p>vs Warfarin cohort:<br/>6,964 AF patients on Warfarin<br/>Mean age 69.0 (±12.3)<br/>38% Female<br/>Mean CHA<sub>2</sub>DS<sub>2</sub>-VASC 2.8 (±1.6)<br/>Mean HAS-BLED 2.2 (±1.2)<br/>Mean Deyo-Charlson 1.8 (±2.0)</p> <p>vs Dabigatran cohort:<br/>4,407 AF patients on Dabigatran<br/>Mean age 66.9 (±12.2)<br/>36% Female<br/>Mean CHA<sub>2</sub>DS<sub>2</sub>-VASC 2.6 (±1.7)<br/>Mean HAS-BLED 2.0 (±1.2)<br/>Mean Deyo-Charlson 1.6 (±1.9)</p> <p>vs Rivaroxaban cohort:<br/>7,399 AF patients on Rivaroxaban<br/>Mean age 68.3 (±12.2)<br/>39% Female<br/>Mean CHA<sub>2</sub>DS<sub>2</sub>-VASC 2.8 (±1.7)<br/>Mean HAS-BLED 2.1 (±1.2)<br/>Mean Deyo-Charlson 1.7 (±2.0)</p> | Major bleeding requiring hospitalisation | <p>Apixaban vs Warfarin cohort:<br/>Apixaban 148.1 days<br/>Warfarin 161.6 days</p> <p>Apixaban vs Dabigatran cohort:<br/>Apixaban 145.6 days<br/>Dabigatran 179.0 days</p> <p>Apixaban vs Rivaroxaban cohort:<br/>Apixaban 147.6 days<br/>Rivaroxaban 182.1 days</p> | +                                                                                                   |

| First author, Year, country<br><br>Study design                                            | Apixaban<br>n=participants<br>mean (±SD) Age (years)<br>% Female/Male<br>Charlson comorbidity index<br>CHA <sub>2</sub> DS <sub>2</sub> -VASC score<br>HAS-BLED score | Comparator(s)<br>n=patients<br>mean (±SD) Age (years)<br>% Female/Male<br>Charlson comorbidity index<br>CHA <sub>2</sub> DS <sub>2</sub> -VASC score<br>HAS-BLED score                                                                                                                                                                                                                                                                                                                                | Outcomes                                                                                                 | Follow-up                                                                                                          | Impact of Apixaban<br><br>+ Favours Apixaban<br>- Favours comparator<br>= No difference / uncertain |
|--------------------------------------------------------------------------------------------|-----------------------------------------------------------------------------------------------------------------------------------------------------------------------|-------------------------------------------------------------------------------------------------------------------------------------------------------------------------------------------------------------------------------------------------------------------------------------------------------------------------------------------------------------------------------------------------------------------------------------------------------------------------------------------------------|----------------------------------------------------------------------------------------------------------|--------------------------------------------------------------------------------------------------------------------|-----------------------------------------------------------------------------------------------------|
| Lip, 2016b, USA 33<br><br>Retrospective cohort with adjusted HRs                           | 2,402 AF patients on Apixaban<br>Mean age 69.3 (±12.3)<br>37% Female<br>Mean CHA <sub>2</sub> DS <sub>2</sub> -VASC 2.8 (±1.6)<br>Mean Charlson 1.9 (±2.0)            | 4,173 AF patients on Dabigatran<br>Mean age 66.8 (±12.8)<br>34% Female<br>Mean CHA <sub>2</sub> DS <sub>2</sub> -VASC 2.6 (±1.7)<br>Mean Charlson 1.7 (±2.0)<br><br>10,050 AF patients on Rivaroxaban<br>Mean age 67.3 (±12.3)<br>37% Female<br>Mean CHA <sub>2</sub> DS <sub>2</sub> -VASC 2.6 (±1.7)<br>Mean Charlson 1.8 (±2.0)<br><br>12,713 AF patients on Warfarin<br>Mean age 72.5 (±11.9)<br>39% Female<br>Mean CHA <sub>2</sub> DS <sub>2</sub> -VASC 3.2 (±1.7)<br>Mean Charlson 2.4 (±2.3) | Major bleeding                                                                                           | Apixaban = 90.4 days<br><br>Dabigatran = 126.7 = days<br><br>Rivaroxaban = 117.7 days<br><br>Warfarin = 127.6 days | +                                                                                                   |
| Lip, 2017, Denmark 76<br><br>Retrospective with Inverse Probability of Treatment Weighting | Unweighted cohorts<br>1,470 AF patients on Apixaban<br>Median age 67.4 (IQR 62.5 - 70.9)<br>40% Female<br>Mean HAS-BLED 1.5 (±0.6)                                    | Unweighted cohorts<br>7,674 AF patients on Warfarin<br>Median age 66.2 (IQR 60.5 - 70.4)<br>36% Female<br>Mean HAS-BLED 1.5 (±0.7)                                                                                                                                                                                                                                                                                                                                                                    | Ischaemic stroke / SE<br>All-cause mortality<br>Any bleeding<br>Intracranial / gastrointestinal bleeding | 1 year                                                                                                             | =                                                                                                   |
| Lip, 2018, USA 77<br><br>Retrospective with PSM                                            | 100,977 AF patients on Apixaban<br>Mean age 76.1<br>49% Female<br>Mean CHA <sub>2</sub> DS <sub>2</sub> -VASC 3.9                                                     | 100,977 AF patients on Warfarin<br>Mean age 76.0<br>49% Female<br>Mean CHA <sub>2</sub> DS <sub>2</sub> -VASC 3.9                                                                                                                                                                                                                                                                                                                                                                                     | Stroke / SE<br>Ischaemic stroke<br>Haemorrhagic stroke<br>SE<br>Major bleeding                           | Mean follow-up in days<br><br>Apixaban vs Warfarin:<br>Apixaban = 187.6<br>Warfarin = 242.3                        | +                                                                                                   |

| First author, Year, country<br><br>Study design | Apixaban<br>n=participants<br>mean (±SD) Age (years)<br>% Female/Male<br>Charlson comorbidity index<br>CHA <sub>2</sub> DS <sub>2</sub> -VAsC score<br>HAS-BLED score                                                                                                                                                                                                                                                        | Comparator(s)<br>n=patients<br>mean (±SD) Age (years)<br>% Female/Male<br>Charlson comorbidity index<br>CHA <sub>2</sub> DS <sub>2</sub> -VAsC score<br>HAS-BLED score                                                                                                                                                                                                                 | Outcomes                                                                                                                                    | Follow-up                                                                                                                                                                                                                                     | Impact of Apixaban<br><br>+ Favours Apixaban<br>- Favours comparator<br>= No difference / uncertain |
|-------------------------------------------------|------------------------------------------------------------------------------------------------------------------------------------------------------------------------------------------------------------------------------------------------------------------------------------------------------------------------------------------------------------------------------------------------------------------------------|----------------------------------------------------------------------------------------------------------------------------------------------------------------------------------------------------------------------------------------------------------------------------------------------------------------------------------------------------------------------------------------|---------------------------------------------------------------------------------------------------------------------------------------------|-----------------------------------------------------------------------------------------------------------------------------------------------------------------------------------------------------------------------------------------------|-----------------------------------------------------------------------------------------------------|
|                                                 | Mean HAS-BLED 3.1<br><br>37,314 AF patients on Apixaban<br>Mean age 73.2<br>Mean CHA <sub>2</sub> DS <sub>2</sub> -VASC 3.5<br>Mean HAS-BLED 2.8<br><br>107,236 AF patients on Apixaban<br>Mean age 75.2<br>48% Female<br>Mean CHA <sub>2</sub> DS <sub>2</sub> -VASC 3.8<br>Mean HAS-BLED 3.0                                                                                                                               | Mean HAS-BLED 3.0<br><br>37,314 AF patients on Dabigatran<br>Mean age 73.0<br>Mean CHA <sub>2</sub> DS <sub>2</sub> -VASC 3.5<br>Mean HAS-BLED 2.8<br><br>107,236 AF patients on Rivaroxaban<br>Mean age 75.1<br>48.5% Female<br>Mean CHA <sub>2</sub> DS <sub>2</sub> -VASC 3.7<br>Mean HAS-BLED 3.0                                                                                  | GI bleeding<br>Intracranial haemorrhage<br>Other bleeding                                                                                   | Apixaban vs Dabigatran<br>Apixaban = 186.0<br>Dabigatran = 226.3<br><br>Apixaban vs Rivaroxaban<br>Apixaban = 187.2<br>Rivaroxaban = 230.3                                                                                                    |                                                                                                     |
| Lip, 2020, USA 78<br><br>Retrospective with PSM | 41,662 AF patients on Apixaban<br>Mean age 76.9 (±8.9)<br>51% Female<br>Mean CHA <sub>2</sub> DS <sub>2</sub> -VASC 4.4 (±1.6)<br>Mean HAS-BLED 3.5 (±1.3)<br>Mean Charlson 3.9 (±2.8)<br><br>13,969 AF patients on Apixaban<br>Mean age 74.6 (±9.2)<br>48.6% Female<br>Mean CHA <sub>2</sub> DS <sub>2</sub> -VASC 4.1 (±1.6)<br>Mean HAS-BLED 3.2 (±1.3)<br>Mean Charlson 3.4 (±2.7)<br><br>43,250 AF patients on Apixaban | 41,662 AF patients on Warfarin<br>Mean age 76.9 (±8.8)<br>52% Female<br>Mean CHA <sub>2</sub> DS <sub>2</sub> -VASC 4.4 (±1.5)<br>Mean HAS-BLED 3.5 (±1.3)<br>Mean Charlson 3.9 (±2.8)<br><br>13,969 AF patients on Dabigatran<br>Mean age 74.6 (±9.1)<br>48% Female<br>Mean CHA <sub>2</sub> DS <sub>2</sub> -VASC 4.1 (±1.6)<br>Mean HAS-BLED 3.2 (±1.3)<br>Mean Charlson 3.5 (±2.7) | Stroke / SE<br>Ischaemic stroke<br>Haemorrhagic stroke<br>SE<br>Major bleeding<br>GI bleeding<br>Intracranial haemorrhage<br>Other bleeding | Mean follow-up in days<br><br>Apixaban vs Warfarin:<br>Apixaban = 186.8<br>Warfarin = 238.4<br><br>Apixaban vs Dabigatran<br>Apixaban = 191.0<br>Dabigatran = 233.6<br><br>Apixaban vs Rivaroxaban<br>Apixaban = 187.7<br>Rivaroxaban = 229.9 | +                                                                                                   |

| First author, Year, country<br><br>Study design      | Apixaban<br><i>n</i> =participants<br>mean (±SD) Age (years)<br>% Female/Male<br>Charlson comorbidity index<br>CHA <sub>2</sub> DS <sub>2</sub> -VASc score<br>HAS-BLED score                                                                                                                                                      | Comparator(s)<br><i>n</i> =patients<br>mean (±SD) Age (years)<br>% Female/Male<br>Charlson comorbidity index<br>CHA <sub>2</sub> DS <sub>2</sub> -VASc score<br>HAS-BLED score                                                                                                                                                        | Outcomes                                                                                                      | Follow-up                                                                                                                                            | Impact of Apixaban<br><br>+ Favours Apixaban<br>- Favours comparator<br>= No difference / uncertain |
|------------------------------------------------------|------------------------------------------------------------------------------------------------------------------------------------------------------------------------------------------------------------------------------------------------------------------------------------------------------------------------------------|---------------------------------------------------------------------------------------------------------------------------------------------------------------------------------------------------------------------------------------------------------------------------------------------------------------------------------------|---------------------------------------------------------------------------------------------------------------|------------------------------------------------------------------------------------------------------------------------------------------------------|-----------------------------------------------------------------------------------------------------|
|                                                      | Mean age 76.2 (±9.2)<br>51.1% Female<br>Mean CHA <sub>2</sub> DS <sub>2</sub> -VASC 4.3 (±1.6)<br>Mean HAS-BLED 3.4 (±1.3)<br>Mean Charlson 3.7 (±2.8)                                                                                                                                                                             | 43,250 AF patients on Rivaroxaban<br>Mean age 76.1 (±9.2)<br>51% Female<br>Mean CHA <sub>2</sub> DS <sub>2</sub> -VASC 4.3 (±1.6)<br>Mean HAS-BLED 3.4 (±1.3)<br>Mean Charlson 3.7 (±2.8)                                                                                                                                             |                                                                                                               |                                                                                                                                                      |                                                                                                     |
| Martinez, 2018, USA 20<br><br>Retrospective with PSM | Propensity matched cohort:<br><br>1,392 AF patients on Apixaban<br>Median age 86 (IQR 83-89)<br>64% Male<br>Median CHA <sub>2</sub> DS <sub>2</sub> -VASC 4 (IQR 4-5)<br>Median HAS-BLED 2 (IQR 2-3)                                                                                                                               | Propensity matched cohort:<br><br>1,392 AF patients on Warfarin<br>Median age 86 (IQR 83-89)<br>63% Male<br>Median CHA <sub>2</sub> DS <sub>2</sub> -VASC 4 (IQR 4-5)<br>Median HAS-BLED 2 (2-3)                                                                                                                                      | Stroke / SE<br>Ischaemic stroke<br>Major bleed<br>Haemorrhagic stroke<br>Intracranial haemorrhage<br>GI bleed | Median 0.9 (IQR 0.4-1.6) years<br><br>1 year and 2 year follow-up also provided given in results                                                     | -                                                                                                   |
| Mentias, 2020, USA 79<br><br>Retrospective with PSM  | Propensity matched cohorts based on degree of polypharmacy<br><br>High polypharmacy (>8 meds):<br>723 AF patients on Apixaban<br>Mean age 74.8 (±6.6)<br>53% Female<br>Mean CHA <sub>2</sub> DS <sub>2</sub> -VASC 5.1 (±1.6)<br>Mean HAS-BLED 3.13 (±1.0)<br><br>Medium polypharmacy (4-8 meds):<br>1,487 AF patients on Apixaban | Propensity matched cohorts based on degree of polypharmacy<br><br>High polypharmacy (>8 meds):<br>723 AF patients on Rivaroxaban<br>Mean age 74.5 (±6.5)<br>51% Female<br>Mean CHA <sub>2</sub> DS <sub>2</sub> -VASC 5.0 (±1.7)<br>Mean HAS-BLED 3.2 (±1.1)<br><br>723 AF patients on Warfarin<br>Mean age 74.4 (±6.6)<br>54% Female | Ischaemic stroke<br>Bleeding<br>GI bleeding<br>Intracranial bleeding<br>All-cause mortality                   | Not clearly stated - they reported crude rates as per 100 patient years but the paper does not appear to clarify average follow-up duration per drug | =                                                                                                   |

| First author, Year, country<br><br>Study design | Apixaban<br>n=participants<br>mean (±SD) Age (years)<br>% Female/Male<br>Charlson comorbidity index<br>CHA <sub>2</sub> DS <sub>2</sub> -VAsC score<br>HAS-BLED score                                                                                                                                                     | Comparator(s)<br>n=patients<br>mean (±SD) Age (years)<br>% Female/Male<br>Charlson comorbidity index<br>CHA <sub>2</sub> DS <sub>2</sub> -VAsC score<br>HAS-BLED score                                                                                                                                                                                                                                                                                                                                                                                                                                                                                                                                                      | Outcomes | Follow-up | Impact of Apixaban<br><br>+ Favours Apixaban<br>- Favours comparator<br>= No difference / uncertain |
|-------------------------------------------------|---------------------------------------------------------------------------------------------------------------------------------------------------------------------------------------------------------------------------------------------------------------------------------------------------------------------------|-----------------------------------------------------------------------------------------------------------------------------------------------------------------------------------------------------------------------------------------------------------------------------------------------------------------------------------------------------------------------------------------------------------------------------------------------------------------------------------------------------------------------------------------------------------------------------------------------------------------------------------------------------------------------------------------------------------------------------|----------|-----------|-----------------------------------------------------------------------------------------------------|
|                                                 | Mean age 75.3 (±6.4)<br>50% Female<br>Mean CHA <sub>2</sub> DS <sub>2</sub> -VASC 4.5 (±1.6)<br>Mean HAS-BLED 2.8 (±1.0)<br><br>Low polypharmacy (<=3 meds):<br>1,219 AF patients on Apixaban<br>Mean age 76.0 (±6.4)<br>47% Female<br>Mean CHA <sub>2</sub> DS <sub>2</sub> -VASC 4.2 (±1.6)<br>Mean HAS-BLED 2.5 (±0.9) | Mean CHA <sub>2</sub> DS <sub>2</sub> -VASC 5.1 (±1.7)<br>Mean HAS-BLED 3.1 (±1.1)<br><br>Medium polypharmacy (4-8 meds):<br>1,487 AF patients on Rivaroxaban<br>Mean age 75.2 (±6.5)<br>48% Female<br>Mean CHA <sub>2</sub> DS <sub>2</sub> -VASC 4.5 (±1.6)<br>Mean HAS-BLED 2.7 (±1.0)<br><br>1,487 AF patients on Warfarin<br>Mean age 75.3 (±6.7)<br>50% Female<br>Mean CHA <sub>2</sub> DS <sub>2</sub> -VASC 4.6 (±1.6)<br>Mean HAS-BLED 2.8 (±1.0)<br><br>Low polypharmacy (<=3 meds):<br>1,219 AF patients on Rivaroxaban<br>Mean age 75.7 ± 6.4<br>46% Female<br>Mean CHA <sub>2</sub> DS <sub>2</sub> -VASC 4.14 ± 1.60<br>Mean HAS-BLED 2.47 ± 0.91<br><br>1,219 AF patients on Warfarin<br>Mean age 76.0 ± 6.6 |          |           |                                                                                                     |

| First author, Year, country<br><br>Study design              | Apixaban<br><i>n</i> =participants<br>mean (±SD) Age (years)<br>% Female/Male<br>Charlson comorbidity index<br>CHA <sub>2</sub> DS <sub>2</sub> -VAsC score<br>HAS-BLED score                                                  | Comparator(s)<br><i>n</i> =patients<br>mean (±SD) Age (years)<br>% Female/Male<br>Charlson comorbidity index<br>CHA <sub>2</sub> DS <sub>2</sub> -VAsC score<br>HAS-BLED score                                                                                                                                                                                                           | Outcomes                                                                                                                                                                                | Follow-up                                                                                                                    | Impact of Apixaban<br><br>+ Favours Apixaban<br>- Favours comparator<br>= No difference / uncertain |
|--------------------------------------------------------------|--------------------------------------------------------------------------------------------------------------------------------------------------------------------------------------------------------------------------------|------------------------------------------------------------------------------------------------------------------------------------------------------------------------------------------------------------------------------------------------------------------------------------------------------------------------------------------------------------------------------------------|-----------------------------------------------------------------------------------------------------------------------------------------------------------------------------------------|------------------------------------------------------------------------------------------------------------------------------|-----------------------------------------------------------------------------------------------------|
|                                                              |                                                                                                                                                                                                                                | 47% Female<br>Mean CHA <sub>2</sub> DS <sub>2</sub> -VASC 4.25 ± 1.54<br>Mean HAS-BLED 2.49 ± 0.92                                                                                                                                                                                                                                                                                       |                                                                                                                                                                                         |                                                                                                                              |                                                                                                     |
| Mitsuntisuk, 2021, Thailand 34<br><br>Retrospective with PSM | Unadjusted cohort (PSM used but matched cohort data not given)<br><br>405 AF patients on Apixaban<br>Mean age 73.9 (±10.2)<br>50% Female<br>Mean CHA <sub>2</sub> DS <sub>2</sub> -VASC 3.9 (±1.7)<br>Mean HAS-BLED 1.7 (±1.0) | Unadjusted cohort (PSM used but matched cohort data not given)<br><br>605 AF patients on Warfarin<br>Mean age 68.4 (±11.4)<br>50% Female<br>Mean CHA <sub>2</sub> DS <sub>2</sub> -VASC 3.3 (±1.8)<br>Mean HAS-BLED 1.3 (±0.9)                                                                                                                                                           | Stroke / SE<br>Ischaemic stroke<br>Haemorrhagic stroke<br>Major bleeding<br>Intracranial haemorrhage<br>GI bleeding<br>Other sites major bleeding                                       | Apixaban = 1.90 years<br>Warfarin = 2.82 years<br><br>Followed until first occurrence of any outcome or end of study period. | +                                                                                                   |
| Mueller, 2019, UK 46<br><br>Retrospective with adjusted HRs  | 6,200 AF patients on Apixaban<br>Mean age 73.7 (±11.5)<br>47% Female<br>Mean CHA <sub>2</sub> DS <sub>2</sub> -VASC 2.9 (±1.7)<br>Mean HAS-BLED 2.1 (±1.2)<br>Mean Charlson 1.4 (±1.7)                                         | 1,112 AF patients on Dabigatran<br>Mean age 71.1 (±12.0)<br>37% Female<br>Mean CHA <sub>2</sub> DS <sub>2</sub> -VASC 2.5 (±1.8)<br>Mean HAS-BLED 1.9 (±1.2)<br>Mean Charlson 1.1 ±1.5)<br><br>7,265 AF patients on Rivaroxaban<br>Mean age 74.8 (±11.0)<br>46% Female<br>Mean CHA <sub>2</sub> DS <sub>2</sub> -VASC 3.0 (±1.7)<br>Mean HAS-BLED 2.0 (±1.2)<br>Mean Charlson 1.3 (±1.7) | Ischaemic stroke<br>SE<br>Cardiovascular death<br>Pulmonary embolism<br>TIA<br>Myocardial infarction<br>All-cause mortality<br>Haemorrhagic stroke<br>GI bleeding<br>Other major bleeds | Apixaban = 188 days<br>Dabigatran = 216 days                                                                                 | =                                                                                                   |
| Nielsen, 2017, Denmark 35                                    | Unadjusted cohorts<br>4,400 patients on Apixaban                                                                                                                                                                               | Unadjusted cohort<br>38,893 patients on Warfarin                                                                                                                                                                                                                                                                                                                                         | Ischaemic stroke / SE<br>Ischaemic stroke                                                                                                                                               | 1 year + 2.5 year                                                                                                            | =                                                                                                   |

| First author, Year, country<br><br>Study design               | Apixaban<br>n=participants<br>mean (±SD) Age (years)<br>% Female/Male<br>Charlson comorbidity index<br>CHA <sub>2</sub> DS <sub>2</sub> -VAsC score<br>HAS-BLED score                                                                                                                                                                                                                                                                                                                           | Comparator(s)<br>n=patients<br>mean (±SD) Age (years)<br>% Female/Male<br>Charlson comorbidity index<br>CHA <sub>2</sub> DS <sub>2</sub> -VAsC score<br>HAS-BLED score                                                                                                                                                                                                                                                                                                                               | Outcomes                                                                                          | Follow-up                                                                                                                                                                                     | Impact of Apixaban<br><br>+ Favours Apixaban<br>- Favours comparator<br>= No difference / uncertain |
|---------------------------------------------------------------|-------------------------------------------------------------------------------------------------------------------------------------------------------------------------------------------------------------------------------------------------------------------------------------------------------------------------------------------------------------------------------------------------------------------------------------------------------------------------------------------------|------------------------------------------------------------------------------------------------------------------------------------------------------------------------------------------------------------------------------------------------------------------------------------------------------------------------------------------------------------------------------------------------------------------------------------------------------------------------------------------------------|---------------------------------------------------------------------------------------------------|-----------------------------------------------------------------------------------------------------------------------------------------------------------------------------------------------|-----------------------------------------------------------------------------------------------------|
| Retrospective with Inverse Probability of Treatment Weighting | Mean age 83.9 (±8.2)<br>61% Female<br>Mean CHA <sub>2</sub> DS <sub>2</sub> -VAsC 4.3 (±1.5)<br>Mean HAS-BLED 2.8 (±1.5)                                                                                                                                                                                                                                                                                                                                                                        | Mean age 71.0 (±12.6)<br>40% Female<br>Mean CHA <sub>2</sub> DS <sub>2</sub> -VAsC 3.0 (±1.7)<br>Mean HAS-BLED 2.4 (±1.2)                                                                                                                                                                                                                                                                                                                                                                            | All-cause mortality<br>Any bleeding<br>Major bleeding<br>Haemorrhagic stroke                      | Mean follows ups not given but states overall mean was 2.3 years with shortest mean in Apixaban group of 1 year.                                                                              |                                                                                                     |
| Noseworthy, 2016, USA 80<br><br>Retrospective with PSM        | Propensity matched cohorts:<br>Apixaban vs Dabigatran:<br>6,542 AF patients on Apixaban<br>Median age 73 (IQR 65-81)<br>54% Male<br>Median CHA <sub>2</sub> DS <sub>2</sub> -VAsC 4 (IQR 3-5)<br>Median HAS-BLED 2 (IQR 2-3)<br>Median Charlson 2 (IQR 1-4)<br><br>Apixaban vs Rivaroxban:<br>6,565 AF patients on Apixaban<br>Median age 73 (IQR 65-81)<br>54% Male<br>Median CHA <sub>2</sub> DS <sub>2</sub> -VAsC 4 (IQR 3-5)<br>Median HAS-BLED 2 (IQR 2-3)<br>Median Charlson 2 (IQR 1-4) | Propensity matched cohorts:<br>Apixaban vs Dabigatran:<br>6,542 AF patients on Dabigatran<br>Median age 73 (IQR 65-81)<br>54% Male<br>Median CHA <sub>2</sub> DS <sub>2</sub> -VAsC 4 (IQR 3-5)<br>Median HAS-BLED 2 (IQR 2-3)<br>Median Charlson 2 (IQR 1-4)<br><br>Apixaban vs Rivaroxban:<br>6,565 AF patients on Rivaroxaban<br>Median age 73 (IQR 65-81)<br>54% Male<br>Median CHA <sub>2</sub> DS <sub>2</sub> -VAsC 4 (IQR 3-5)<br>Median HAS-BLED 2 (IQR 2-3)<br>Median Charlson 2 (IQR 1-4) | Stroke / SE<br>Ischaemic stroke<br>Haemorrhagic stroke<br>Major bleeding<br>Intracranial bleeding | Follow-up per cohort NR.<br><br>Results presented as event rates /100 PY.<br><br>Sensitivity analysis by censoring at 6 months was reportedly not significantly different to overall outcome. | +                                                                                                   |
| Noseworthy, 2017, USA 22<br><br>Retrospective                 | 12,949 AF patients on Apixaban<br>Median age 74 (IQR 67 - 81)<br>48% Female<br>CHA <sub>2</sub> DS <sub>2</sub> -VAsC ≤ 3 42%<br>CHA <sub>2</sub> DS <sub>2</sub> -VAsC 4 22%                                                                                                                                                                                                                                                                                                                   | 68,804 AF patients on Warfarin<br>Median age 73 (IQR 64-80)<br>42.7% Female<br>CHA <sub>2</sub> DS <sub>2</sub> -VAsC ≤ 3 41.4%<br>CHA <sub>2</sub> DS <sub>2</sub> -VAsC 4 21.1%                                                                                                                                                                                                                                                                                                                    | Stroke<br>Major bleeding                                                                          | 12-months                                                                                                                                                                                     | =                                                                                                   |



| First author, Year, country<br><br>Study design | Apixaban<br>n=participants<br>mean (±SD) Age (years)<br>% Female/Male<br>Charlson comorbidity index<br>CHA <sub>2</sub> DS <sub>2</sub> -VAsC score<br>HAS-BLED score | Comparator(s)<br>n=patients<br>mean (±SD) Age (years)<br>% Female/Male<br>Charlson comorbidity index<br>CHA <sub>2</sub> DS <sub>2</sub> -VAsC score<br>HAS-BLED score                                                                                                                                                                                                                                                                                                                                                                                                                                                                                                                                                                                                                        | Outcomes | Follow-up | Impact of Apixaban<br><br>+ Favours Apixaban<br>- Favours comparator<br>= No difference / uncertain |
|-------------------------------------------------|-----------------------------------------------------------------------------------------------------------------------------------------------------------------------|-----------------------------------------------------------------------------------------------------------------------------------------------------------------------------------------------------------------------------------------------------------------------------------------------------------------------------------------------------------------------------------------------------------------------------------------------------------------------------------------------------------------------------------------------------------------------------------------------------------------------------------------------------------------------------------------------------------------------------------------------------------------------------------------------|----------|-----------|-----------------------------------------------------------------------------------------------------|
|                                                 | CHA <sub>2</sub> DS <sub>2</sub> -VAsC ≥/ = 5 35.9%<br><br>HAS-BLED 0,1 19.5%<br>HAS-BLED 2 36.3%<br>HAS-BLED 3 27.3%<br>HAS-BLED ≥/ =4 16.8%                         | CHA <sub>2</sub> DS <sub>2</sub> -VAsC ≥/ = 5 37.4%<br><br>HAS-BLED 0,1 21.5%<br>HAS-BLED 2 34.2%<br>HAS-BLED 3 27.3%<br>HAS-BLED ≥/ =4 17.1%<br><br>9,412 AF patients on Dabigatran<br>Median age 69 (IQR 61-77)<br>38.7% Female<br>CHA <sub>2</sub> DS <sub>2</sub> -VAsC ≤/ = 3 56.4%<br>CHA <sub>2</sub> DS <sub>2</sub> -VAsC 4 19.6%<br>CHA <sub>2</sub> DS <sub>2</sub> -VAsC ≥/ = 5 23.9%<br><br>HAS-BLED 0,1 31.6%<br>HAS-BLED 2 36.3%<br>HAS-BLED 3 21.9%<br>HAS-BLED ≥/ =4 10.2%<br><br>68,804 AF patients on Rivaroxaban<br>Median age 71 (IQR 63-78)<br>41.2% Female<br>CHA <sub>2</sub> DS <sub>2</sub> -VAsC ≤/ = 3 52.4%<br>CHA <sub>2</sub> DS <sub>2</sub> -VAsC 4 20.6%<br>CHA <sub>2</sub> DS <sub>2</sub> -VAsC ≥/ = 5 27%<br><br>HAS-BLED 0,1 26.8%<br>HAS-BLED 2 37.1% |          |           |                                                                                                     |

| First author, Year, country<br><br>Study design          | Apixaban<br><i>n</i> =participants<br>mean (±SD) Age (years)<br>% Female/Male<br>Charlson comorbidity index<br>CHA <sub>2</sub> DS <sub>2</sub> -VAsC score<br>HAS-BLED score                    | Comparator(s)<br><i>n</i> =patients<br>mean (±SD) Age (years)<br>% Female/Male<br>Charlson comorbidity index<br>CHA <sub>2</sub> DS <sub>2</sub> -VAsC score<br>HAS-BLED score      | Outcomes                                                                                                                                                                                                                                                                                                                                                                           | Follow-up | Impact of Apixaban<br><br>+ Favours Apixaban<br>- Favours comparator<br>= No difference / uncertain |
|----------------------------------------------------------|--------------------------------------------------------------------------------------------------------------------------------------------------------------------------------------------------|-------------------------------------------------------------------------------------------------------------------------------------------------------------------------------------|------------------------------------------------------------------------------------------------------------------------------------------------------------------------------------------------------------------------------------------------------------------------------------------------------------------------------------------------------------------------------------|-----------|-----------------------------------------------------------------------------------------------------|
|                                                          |                                                                                                                                                                                                  | HAS-BLED 3 24.5%<br>HAS-BLED ≥4 11.6%                                                                                                                                               |                                                                                                                                                                                                                                                                                                                                                                                    |           |                                                                                                     |
| Ogawa, 2011, Japan 14<br><br>RCT                         | 74 patients on Apixaban (2.5mg BD)<br>- 72 treated, 7 discontinued<br>Mean age 69<br>Male 85%<br><br>74 patients on Apixaban (5mg BD)<br>- 71 treated, 5 discontinued<br>Mean age 70<br>Male 82% | 74 patients Warfarin as per INR<br>Mean age 72<br>Male 81%                                                                                                                          | Composite primary outcome was major and clinically relevant non-major (CRNM) bleeding.<br><br>Secondary endpoints: major or CRNM bleeding separately, total bleeding composite, minor bleeding.<br><br>Bleeding defined using ISTH criteria.<br><br>Efficacy endpoints: composite of stroke and SE; composite of stroke SE or all-cause death; composite of MI or all-cause death. | 12-weeks  | =                                                                                                   |
| Perreault, 2021, Canada 47<br><br>Retrospective with PSM | 6,771 patients on Apixaban<br>Mean age 76.3 (±8.5)<br>51% Male<br>Mean CHA <sub>2</sub> DS <sub>2</sub> -VAsC 3.4 (±1.4)<br>Mean HAS-BLED 2.9 (±1.3)<br>Mean Charlson 4.4 (±3.4)                 | 4,632 patients on Rivaroxaban<br>Age mean 73.2 (±9.1)<br>Male 55%<br>Mean CHA <sub>2</sub> DS <sub>2</sub> -VAsC 3.0 (±1.4)<br>Mean HAS-BLED 2.5 (±1.3)<br>Mean Charlson 3.6 (±3.2) | Primary:<br>(i) Composite of ischaemic stroke/SE, acute MI, all-cause mortality.<br>(ii) composite of major                                                                                                                                                                                                                                                                        | 12-months | +                                                                                                   |

| First author, Year, country<br><br>Study design                                        | Apixaban<br><i>n</i> =participants<br>mean (±SD) Age (years)<br>% Female/Male<br>Charlson comorbidity index<br>CHA <sub>2</sub> DS <sub>2</sub> -VASc score<br>HAS-BLED score | Comparator(s)<br><i>n</i> =patients<br>mean (±SD) Age (years)<br>% Female/Male<br>Charlson comorbidity index<br>CHA <sub>2</sub> DS <sub>2</sub> -VASc score<br>HAS-BLED score                                | Outcomes                                                                                                                                   | Follow-up | Impact of Apixaban<br><br>+ Favours Apixaban<br>- Favours comparator<br>= No difference / uncertain |
|----------------------------------------------------------------------------------------|-------------------------------------------------------------------------------------------------------------------------------------------------------------------------------|---------------------------------------------------------------------------------------------------------------------------------------------------------------------------------------------------------------|--------------------------------------------------------------------------------------------------------------------------------------------|-----------|-----------------------------------------------------------------------------------------------------|
|                                                                                        |                                                                                                                                                                               |                                                                                                                                                                                                               | bleeding (ICH, GI and major from other sites).<br><br>Secondary:<br>Stroke/SE/death<br>Stroke/SE<br>Death<br>Acute MI<br>Bleeding outcomes |           |                                                                                                     |
| Ramagopalan, 2019, Spain 36<br><br>Retrospective with PSM                              | 2,160 Apixaban<br>Age mean 71.2 (±12.8)<br>48% Male<br>Mean Charlson 2.5 (±2.0)<br>Mean CHA <sub>2</sub> DS <sub>2</sub> -VASc 3.3 (±1.9)<br>Mean HAS-BLED 2.0 (±1.3)         | 2,160 patients on VKA (acenocoumarol or warfarin)<br>Mean age 71.6 (±10.1)<br>48% Male<br>Mean Charlson 2.6 (±1.9)<br>Mean CHA <sub>2</sub> DS <sub>2</sub> -VASc mean 3.4 (±1.7)<br>Mean HAS-BLED 2.1 (±1.1) | Ischaemic stroke and SE<br>Major bleeding (intracranial, GI, other sites requiring hospital admission)<br>Minor bleeding                   | 12-months | +                                                                                                   |
| Ramagopalan, 2018, Spain 81<br><br>Retrospective with PSM                              | 1,521 patients on Apixaban<br>Median age 79 (IQR 35-100)<br>49% Male                                                                                                          | Pre-PSM<br>8,393 patients on VKA<br>Median age 78 (IQR 20-104)<br>52% Male                                                                                                                                    | Major bleeding (including GI bleeding, intracranial bleeding, bleeding from other sites).                                                  | 10-months | +                                                                                                   |
| Ray, 2021, USA 18<br><br>Retrospective with Inverse Probability of Treatment Weighting | 353,879 patients on Apixaban<br>Mean age 77 (±7)<br>50% Male<br>Mean CHA <sub>2</sub> DS <sub>2</sub> -VASc 4.3                                                               | 227,572 patients on Rivaroxaban<br>Mean age 77 (±7)<br>50% Male<br>Mean CHA <sub>2</sub> DS <sub>2</sub> -VASc 4.3                                                                                            | Major ischaemic or haemorrhagic events<br>Mortality<br>Ischaemic stroke<br>ICH                                                             | 4-years   | +                                                                                                   |

| First author, Year, country<br><br>Study design                                                       | Apixaban<br><i>n</i> =participants<br>mean (±SD) Age (years)<br>% Female/Male<br>Charlson comorbidity index<br>CHA <sub>2</sub> DS <sub>2</sub> -VAsC score<br>HAS-BLED score                                                                                                                                                                                            | Comparator(s)<br><i>n</i> =patients<br>mean (±SD) Age (years)<br>% Female/Male<br>Charlson comorbidity index<br>CHA <sub>2</sub> DS <sub>2</sub> -VAsC score<br>HAS-BLED score                                                                                                                                                                                              | Outcomes                                                                                                                                                                                            | Follow-up                                                                         | Impact of Apixaban<br><br>+ Favours Apixaban<br>- Favours comparator<br>= No difference / uncertain |
|-------------------------------------------------------------------------------------------------------|--------------------------------------------------------------------------------------------------------------------------------------------------------------------------------------------------------------------------------------------------------------------------------------------------------------------------------------------------------------------------|-----------------------------------------------------------------------------------------------------------------------------------------------------------------------------------------------------------------------------------------------------------------------------------------------------------------------------------------------------------------------------|-----------------------------------------------------------------------------------------------------------------------------------------------------------------------------------------------------|-----------------------------------------------------------------------------------|-----------------------------------------------------------------------------------------------------|
| Rodríguez-Bernal, 2018, Spain 44<br><br>Retrospective with Inverse Probability of Treatment Weighting | 32,476 patients on Acenocoumarol<br>Mean age 74.8 (±9.6)<br>48% Female<br>Mean CHA <sub>2</sub> DS <sub>2</sub> -VAsC 3.8 (±1.65)<br>Mean HAS-BLED 2.9 (±1.2)                                                                                                                                                                                                            | 2,259 patients on Apixaban<br>Mean age 75.0 (±10.7)<br>48% Female<br>Mean CHA <sub>2</sub> DS <sub>2</sub> -VAsC 3.9 (±1.8)<br>Mean HAS-BLED 3.0 (±1.3)                                                                                                                                                                                                                     | Mortality<br>Ischaemic stroke<br>TIA<br>GI bleed<br>ICH                                                                                                                                             | Average follow-up of 1.8 years                                                    | =                                                                                                   |
| Rutherford, 2020, Norway 40<br><br>Retrospective with PSM                                             | Dabigatran-apixaban PSM<br>10,413 patients on Apixaban<br>Mean age 70.6 (±11.7)<br>62% Male<br>Mean CHA <sub>2</sub> DS <sub>2</sub> -VAsC 2.94 (±1.72)<br>Mean HAS-BLED 2.3 (±1.2)<br><br>Apixaban-rivaroxaban PSM<br>13,699 patients on Apixaban<br>Age 72.7 (±11.7)<br>58% Male<br>Mean CHA <sub>2</sub> DS <sub>2</sub> -VAsC 3.2 (±1.7)<br>Mean HAS-BLED 2.4 (±1.2) | Dabigatran-apixaban PSM<br>10,413 patients on Dabigatran<br>Age 70.6 (±11.2)<br>62% Male<br>Mean CHA <sub>2</sub> DS <sub>2</sub> -VAsC 2.7 (±1.7)<br>Mean HAS-BLED 2.3 (±1.2)<br><br>Apixaban-rivaroxaban PSM<br>13,699 patients on Rivaroxaban<br>Mean age 72.7 (±11.1)<br>58% Male<br>Mean CHA <sub>2</sub> DS <sub>2</sub> -VAsC 3.2 (±1.7)<br>Mean HAS-BLED 2.4 (±1.1) | Stroke<br>Embolism, time to first ischaemic stroke.<br><br>Time to first major bleed, clinically relevant non-major bleeding (CRNM), major or CRNM bleeding, GI bleeding, intracranial haemorrhage. | 12 months                                                                         | +                                                                                                   |
| Själänder, 2018, Sweden 82<br><br>Retrospective with Full Optimal Matching                            | 12,311 patients on Apixaban<br>Age 75 (78-82)<br>55% Male<br>Mean CHA <sub>2</sub> DS <sub>2</sub> -VAsC 3.2 (±1.8)                                                                                                                                                                                                                                                      | 37,174 patients on Warfarin<br>Age 75 (68-81)<br>60% Male<br>Mean CHA <sub>2</sub> DS <sub>2</sub> -VAsC 3.2 (±1.8)                                                                                                                                                                                                                                                         | Stroke and SE stroke<br>Ischaemic stroke<br>Haemorrhagic stroke (ICH or SAH)<br><br>Major bleed (ICH, GI, fatal or requiring                                                                        | Study length NR.<br><br>37,174 patients (56,164 treatment years) were on warfarin | +                                                                                                   |

| First author, Year, country<br><br>Study design                 | Apixaban<br><i>n</i> =participants<br>mean (±SD) Age (years)<br>% Female/Male<br>Charlson comorbidity index<br>CHA <sub>2</sub> DS <sub>2</sub> -VASc score<br>HAS-BLED score | Comparator(s)<br><i>n</i> =patients<br>mean (±SD) Age (years)<br>% Female/Male<br>Charlson comorbidity index<br>CHA <sub>2</sub> DS <sub>2</sub> -VASc score<br>HAS-BLED score                                                      | Outcomes                                                                                | Follow-up                                                                                                                                                              | Impact of Apixaban<br><br>+ Favours Apixaban<br>- Favours comparator<br>= No difference / uncertain |
|-----------------------------------------------------------------|-------------------------------------------------------------------------------------------------------------------------------------------------------------------------------|-------------------------------------------------------------------------------------------------------------------------------------------------------------------------------------------------------------------------------------|-----------------------------------------------------------------------------------------|------------------------------------------------------------------------------------------------------------------------------------------------------------------------|-----------------------------------------------------------------------------------------------------|
|                                                                 |                                                                                                                                                                               |                                                                                                                                                                                                                                     | hospital care)<br>All-cause mortality                                                   | 6574 patients (8326 treatment years) on dabigatran,<br><br>8323 patients (7956 treatment years) rivaroxaban<br><br>12,311 patients (8730 treatment years) on apixaban. |                                                                                                     |
| Staerk, 2017, Denmark 37<br><br>Retrospective with adjusted HRs | 6,899 patients on Apixaban<br>Age 76 (68-84)<br>50% Male<br>CHA <sub>2</sub> DS <sub>2</sub> -VASc 3.1 (±1.6)<br>HAS-BLED 2.2 (±1.2)                                          | 18,094 patients on VKA<br>Age 73 (65-80)<br>58% Male<br>CHA <sub>2</sub> DS <sub>2</sub> -VASc 2.9 (±1.6)<br>HAS-BLED 2.2 (±1.2)                                                                                                    | Stroke/SE<br>Intracranial bleeding (ICH, SAH, traumatic subdural, traumatic epidural)   | Study period = 2 years.<br><br>Drug specific follow up duration (medians)<br>VKA = 252 days<br>Dabigatran = 386 days<br>Rivaroxaban = 208 days<br>Apixaban = 204 days  | +                                                                                                   |
| Staerk, 2018, Denmark 41<br><br>Retrospective with adjusted HRs | 7,203 patients on Apixaban<br>58% Male<br>Median age 71 (65, 77)<br>Median CHA <sub>2</sub> DS <sub>2</sub> -VASc 3 (2, 4)<br>Median HAS-BLED 2 (1, 3)                        | 7,078 patients on Dabigatran<br>64% Male<br>Median age 67 (61, 71)<br>Median CHA <sub>2</sub> DS <sub>2</sub> -VASc 2 (1, 3)<br>Median HAS-BLED 2 (1, 2)<br><br>6,868 patients on Rivaroxaban<br>55% Male<br>Median age 71 (65, 78) | Stroke/SE<br>Ischaemic stroke<br>Major bleeding<br>Intracranial bleeding<br>GI bleeding | Study period = 2 years.<br><br>Average duration of each cohort follow-up NR.                                                                                           | =                                                                                                   |

| First author, Year, country<br><br>Study design                 | Apixaban<br><i>n</i> =participants<br>mean (±SD) Age (years)<br>% Female/Male<br>Charlson comorbidity index<br>CHA <sub>2</sub> DS <sub>2</sub> -VASc score<br>HAS-BLED score   | Comparator(s)<br><i>n</i> =patients<br>mean (±SD) Age (years)<br>% Female/Male<br>Charlson comorbidity index<br>CHA <sub>2</sub> DS <sub>2</sub> -VASc score<br>HAS-BLED score                                                                                                                                                                                                  | Outcomes                                                                                                                                                                                | Follow-up                                                                                             | Impact of Apixaban<br><br>+ Favours Apixaban<br>- Favours comparator<br>= No difference / uncertain |
|-----------------------------------------------------------------|---------------------------------------------------------------------------------------------------------------------------------------------------------------------------------|---------------------------------------------------------------------------------------------------------------------------------------------------------------------------------------------------------------------------------------------------------------------------------------------------------------------------------------------------------------------------------|-----------------------------------------------------------------------------------------------------------------------------------------------------------------------------------------|-------------------------------------------------------------------------------------------------------|-----------------------------------------------------------------------------------------------------|
|                                                                 |                                                                                                                                                                                 | Median CHA <sub>2</sub> DS <sub>2</sub> -VASc 3 (2,4)<br>Median HAS-BLED 2 (1,3)                                                                                                                                                                                                                                                                                                |                                                                                                                                                                                         |                                                                                                       |                                                                                                     |
| Tepper, 2018, USA 50<br><br>Retrospective with adjusted HRs     | 8,785 patients on Apixaban<br>Mean age 70 (±12)<br>37% Female<br>Mean Charlson = 1.8 (±2)<br>Mean CHA <sub>2</sub> DS <sub>2</sub> -VASc 2.5 (±1.5)<br>Mean HAS-BLED 1.9 (±1.2) | 20,963 patients on Dabigatran<br>Mean age 71 (±11)<br>35% Female<br>Mean Charlson 1.6 (±1.9)<br>Mean CHA <sub>2</sub> DS <sub>2</sub> -VASc 2.4 (±1.4)<br>Mean HAS-BLED 1.8 (±1.2)<br><br>30,529 patients on Rivaroxaban<br>Mean age = 68 (±12)<br>37% Female<br>Mean Charlson 1.8 (±2.2)<br>Mean CHA <sub>2</sub> DS <sub>2</sub> -VASc 2.4 (±1.5)<br>Mean HAS-BLED 1.8 (±1.2) | Any bleeding<br>CRNM bleeding<br>Inpatient major bleeding total<br>Intracranial Haemorrhage<br>GI bleeding<br>Other                                                                     | Apixaban = 184 days<br>Dabigatran = 553 days<br>Rivaroxaban = 300 days                                | +                                                                                                   |
| Tiew, 2020, Singapore 17<br><br>Retrospective with adjusted HRs | 98 patients on Apixaban<br>Mean age 72.9 (±10.6)<br>46% Female<br>Median CHA <sub>2</sub> DS <sub>2</sub> -VASc 3 (2-4)<br>Median HAS-BLED 1 (1-2)                              | 157 patients on Warfarin<br>Mean age 70.4 (±10.8)<br>66% Female<br>Median CHA <sub>2</sub> DS <sub>2</sub> -VASc 3 (2-4)<br>Median HAS-BLED 1 (1-2)<br><br>154 patients on Rivaroxaban<br>Mean age 70.5 (±11.1)<br>66% Female<br>Median CHA <sub>2</sub> DS <sub>2</sub> -VASc 3 (2-4)<br>Median HAS-BLED 1 (1-2)<br><br>30 patients on Dabigatran                              | Primary:<br>Major bleeding and stroke.<br><br>Secondary:<br>Overall bleeding (major bleeding and clinically relevant non-major bleeding)<br>Thromboembolic events (stroke, TIA and SE). | Warfarin = 691.7 days<br>Rivaroxaban = 690.5 days<br>Apixaban = 684.5 days<br>Dabigatran = 609.8 days | =                                                                                                   |

| First author, Year, country<br><br>Study design                                       | Apixaban<br><i>n</i> =participants<br>mean (±SD) Age (years)<br>% Female/Male<br>Charlson comorbidity index<br>CHA <sub>2</sub> DS <sub>2</sub> -VASc score<br>HAS-BLED score         | Comparator(s)<br><i>n</i> =patients<br>mean (±SD) Age (years)<br>% Female/Male<br>Charlson comorbidity index<br>CHA <sub>2</sub> DS <sub>2</sub> -VASc score<br>HAS-BLED score                                                                                                                                                                                                                                                                                                                                                                                                    | Outcomes                                           | Follow-up                                                                                                                                                                    | Impact of Apixaban<br><br>+ Favours Apixaban<br>- Favours comparator<br>= No difference / uncertain |
|---------------------------------------------------------------------------------------|---------------------------------------------------------------------------------------------------------------------------------------------------------------------------------------|-----------------------------------------------------------------------------------------------------------------------------------------------------------------------------------------------------------------------------------------------------------------------------------------------------------------------------------------------------------------------------------------------------------------------------------------------------------------------------------------------------------------------------------------------------------------------------------|----------------------------------------------------|------------------------------------------------------------------------------------------------------------------------------------------------------------------------------|-----------------------------------------------------------------------------------------------------|
|                                                                                       |                                                                                                                                                                                       | Mean age 67.4 (±11.4)<br>13% Female<br>Median CHA <sub>2</sub> DS <sub>2</sub> -VASc 2 (1-4)<br>Median HAS-BLED 1 (1-2)                                                                                                                                                                                                                                                                                                                                                                                                                                                           |                                                    |                                                                                                                                                                              |                                                                                                     |
| Van Ganse, 2020, France 83<br><br>Retrospective with PSM and adjusted effect measures | 87,565 AF patients on Apixaban<br>Mean age 74.7 (±11.5)<br>51% Male<br>Mean CHA <sub>2</sub> DS <sub>2</sub> -VASC 3.1 (±1.7)<br>Mean HAS-BLED 2.2 (±1.0)<br>Mean Charlson 4.5 (±2.3) | 112,628 AF patients on VKA<br>Mean age 78.5 (±11.1)<br>49% Male<br>Mean CHA <sub>2</sub> DS <sub>2</sub> -VASC 3.9 (±1.7)<br>Mean HAS-BLED 2.6 (±1.1)<br>Mean Charlson 5.9 (±2.6)<br><br>100,063 AF patients on Rivaroxaban<br>Mean age 72.0 (±12.0)<br>55% Male<br>Mean CHA <sub>2</sub> DS <sub>2</sub> -VASC 2.7 (±1.7)<br>Mean HAS-BLED 2.0 (±1.0)<br>Mean Charlson 4.0 (±2.2)<br><br>21,245 AF patients on Dabigatran<br>Mean age 72.7 (±11.8)<br>54% Male<br>Mean CHA <sub>2</sub> DS <sub>2</sub> -VASC 2.8 (±1.7)<br>Mean HAS-BLED 2.1 (±1.0)<br>Mean Charlson 4.1 (±2.2) | All-cause mortality<br>Stroke/SE<br>Major bleeding | Mean follow-up duration was 316 days<br><br>For those receiving apixaban, rivaroxaban, and dabigatran, the mean follow-up duration was 286, 318, and 329 days, respectively. | +                                                                                                   |
| Villines, 2019, USA 51                                                                | 4,802 AF patients on Apixaban<br>Mean age 70.2 (±10.0)<br>63% Male                                                                                                                    | 4,802 AF patients on Dabigatran<br>Mean age 70.2 (±10.2)<br>63% Male                                                                                                                                                                                                                                                                                                                                                                                                                                                                                                              | Stroke<br>Major bleeding                           | Dabigatran = 349.5 days<br>Apixaban = 357.7 days                                                                                                                             | =                                                                                                   |

| First author, Year, country<br><br>Study design                                           | Apixaban<br><i>n</i> =participants<br>mean (±SD) Age (years)<br>% Female/Male<br>Charlson comorbidity index<br>CHA <sub>2</sub> DS <sub>2</sub> -VAsC score<br>HAS-BLED score | Comparator(s)<br><i>n</i> =patients<br>mean (±SD) Age (years)<br>% Female/Male<br>Charlson comorbidity index<br>CHA <sub>2</sub> DS <sub>2</sub> -VAsC score<br>HAS-BLED score                  | Outcomes                                                                                    | Follow-up                                                                                         | Impact of Apixaban<br><br>+ Favours Apixaban<br>- Favours comparator<br>= No difference / uncertain |
|-------------------------------------------------------------------------------------------|-------------------------------------------------------------------------------------------------------------------------------------------------------------------------------|-------------------------------------------------------------------------------------------------------------------------------------------------------------------------------------------------|---------------------------------------------------------------------------------------------|---------------------------------------------------------------------------------------------------|-----------------------------------------------------------------------------------------------------|
| Retrospective with PSM                                                                    | Mean CHA <sub>2</sub> DS <sub>2</sub> -VAsC 3.0 (±1.6)<br>Mean HAS-BLED 2.3 (±1.2)<br>Mean Charlson 4.2 (±2.4)                                                                | Mean CHA <sub>2</sub> DS <sub>2</sub> -VAsC 3.0 (±1.7)<br>Mean HAS-BLED 2.3 (±1.2)<br>Mean Charlson 4.2 (±2.5)                                                                                  |                                                                                             |                                                                                                   |                                                                                                     |
| Vinogradova, 2018, UK (Qresearch Database) 16<br><br>Prospective Cohort                   | 9,199 AF patients on Apixaban<br>76.5 (10.9)<br>52% Male                                                                                                                      | 53,921 AF patients on Warfarin<br>74.8 (10.4)<br>56% Male<br><br>4,534 AF patients on Dabigatran<br>74.7 (10.7)<br>58% Male<br><br>13,597 AF patients on Rivaroxaban<br>75.8 (10.9)<br>54% Male | All-cause mortality<br>Ischaemic stroke<br>Major bleeding<br>GI bleed<br>Intracranial bleed | Median Days of treatment<br><br>Apixaban 248<br>Warfarin 344<br>Dabigatran 271<br>Rivaroxaban 265 | +                                                                                                   |
| Vinogradova, 2018, UK (CPRD Database) 16<br><br>Prospective with adjusted effect measures | 1,402 AF patients on Apixaban<br>76.6 (10.9)<br>55% Male                                                                                                                      | 16,664 AF patients on Warfarin<br>74.8 (10.3)<br>56% Male<br><br>1,003 AF patients on Dabigatran<br>74.4 (10.8)<br>62% Male<br><br>2,950 AF patients on Rivaroxaban<br>75.9 (10.8)<br>54% Male  | All-cause mortality<br>Ischaemic stroke<br>Major bleeding<br>GI bleed<br>Intracranial bleed | Median Days of treatment<br><br>Apixaban 143<br>Warfarin 286<br>Dabigatran 214<br>Rivaroxaban 163 | +                                                                                                   |
| Wanat, 2019, USA 38                                                                       | 10,189 AF patients on Apixaban<br>Mean age 72.1 (±9.1)                                                                                                                        | 10,189 AF patients on Warfarin<br>Mean age 72.1 (±9.2)                                                                                                                                          | Stroke/SE<br>Major bleed                                                                    | 12 months                                                                                         | +                                                                                                   |



| First author, Year, country<br><br>Study design           | Apixaban<br><i>n</i> =participants<br>mean (±SD) Age (years)<br>% Female/Male<br>Charlson comorbidity index<br>CHA <sub>2</sub> DS <sub>2</sub> -VASC score<br>HAS-BLED score | Comparator(s)<br><i>n</i> =patients<br>mean (±SD) Age (years)<br>% Female/Male<br>Charlson comorbidity index<br>CHA <sub>2</sub> DS <sub>2</sub> -VASC score<br>HAS-BLED score                                                                                                                                                                                                                                                                                                                                             | Outcomes                                                                                  | Follow-up                                                                             | Impact of Apixaban<br><br>+ Favours Apixaban<br>- Favours comparator<br>= No difference / uncertain |
|-----------------------------------------------------------|-------------------------------------------------------------------------------------------------------------------------------------------------------------------------------|----------------------------------------------------------------------------------------------------------------------------------------------------------------------------------------------------------------------------------------------------------------------------------------------------------------------------------------------------------------------------------------------------------------------------------------------------------------------------------------------------------------------------|-------------------------------------------------------------------------------------------|---------------------------------------------------------------------------------------|-----------------------------------------------------------------------------------------------------|
| Retrospective with PSM                                    | 53% Male<br>Mean CHA <sub>2</sub> DS <sub>2</sub> -VASC 2.5 (±1.3)<br>Mean HAS-BLED 1.5 (±0.9)                                                                                | 53% Male<br>Mean CHA <sub>2</sub> DS <sub>2</sub> -VASC 2.4 (±1.3)<br>Mean HAS-BLED 1.5 (±0.9)                                                                                                                                                                                                                                                                                                                                                                                                                             |                                                                                           |                                                                                       |                                                                                                     |
| Yang, 2020, USA 54<br><br>Retrospective with adjusted HRs | 494 post-stroke AF patients on Apixaban<br>Mean age 80.3 (8.3)<br>35% Male<br>Mean CHA <sub>2</sub> DS <sub>2</sub> -VASC 6.8 (±1.3)<br>Mean HAS-BLED 4.7 (±0.8)              | 247 post-stroke AF patients on Dabigatran<br>Mean age 78.3 (8.4)<br>37% Male<br>Mean CHA <sub>2</sub> DS <sub>2</sub> -VASC 6.6 (±1.3)<br>Mean HAS-BLED 4.6 (±0.8)<br><br>1,104 post-stroke AF patients on Rivaroxaban<br>Mean age 78.8 (8.6)<br>44% Male<br>Mean CHA <sub>2</sub> DS <sub>2</sub> -VASC 6.7 (±1.3)<br>Mean HAS-BLED 4.7 (±0.8)<br><br>3,082 post-stroke AF patients on Warfarin<br>Mean age 77.9 (10.0)<br>39% Male<br>Mean CHA <sub>2</sub> DS <sub>2</sub> -VASC 6.8 (±1.3)<br>Mean HAS-BLED 4.7 (±0.8) | Ischaemic stroke<br>Any bleeding event<br>GI bleeding                                     | Apixaban 178 days<br>Dabigatran 271 days<br>Rivaroxaban 256 days<br>Warfarin 267 days | -                                                                                                   |
| Yao, 2016, USA 84<br><br>Retrospective with PSM           | 7,695 AF patients on Apixaban<br>Median age 73 (IQR 66-81)<br>47% Female<br>Median CHA <sub>2</sub> DS <sub>2</sub> -VASC 4 (IQR 3-5)<br>Median HAS-BLED 2 (IQR 2-3)          | 7,695 AF patients on Warfarin<br>Median age 73 (IQR 66-81)<br>47% Female<br>Median CHA <sub>2</sub> DS <sub>2</sub> -VASC 4 (IQR 3-5)<br>Median HAS-BLED 2 (IQR 2-3)                                                                                                                                                                                                                                                                                                                                                       | Stroke/SE<br>Ischaemic stroke<br>Haemorrhagic stroke<br>Major bleeding<br>ICH<br>GI bleed | 6-months                                                                              | +                                                                                                   |

| First author, Year, country<br><br>Study design                                                                                                                                                                                                                                                                                                                                                                                                                                                                                                                                                                                                                                                                                                                                                                                                                | Apixaban<br>n=participants<br>mean (±SD) Age (years)<br>% Female/Male<br>Charlson comorbidity index<br>CHA <sub>2</sub> DS <sub>2</sub> -VAsC score<br>HAS-BLED score | Comparator(s)<br>n=patients<br>mean (±SD) Age (years)<br>% Female/Male<br>Charlson comorbidity index<br>CHA <sub>2</sub> DS <sub>2</sub> -VAsC score<br>HAS-BLED score | Outcomes | Follow-up | Impact of Apixaban<br><br>+ Favours Apixaban<br>- Favours comparator<br>= No difference /<br>uncertain |
|----------------------------------------------------------------------------------------------------------------------------------------------------------------------------------------------------------------------------------------------------------------------------------------------------------------------------------------------------------------------------------------------------------------------------------------------------------------------------------------------------------------------------------------------------------------------------------------------------------------------------------------------------------------------------------------------------------------------------------------------------------------------------------------------------------------------------------------------------------------|-----------------------------------------------------------------------------------------------------------------------------------------------------------------------|------------------------------------------------------------------------------------------------------------------------------------------------------------------------|----------|-----------|--------------------------------------------------------------------------------------------------------|
| <p>AF; atrial fibrillation, CRNM; clinically relevant non-major (bleeding), GI; gastrointestinal, ICH; intracerebral haemorrhage, INR; international normalised ratio, NR; not reported, SAH; subarachnoid haemorrhage, SE; systemic embolism.</p> <p>CHA<sub>2</sub>DS<sub>2</sub>-VASC; is a stroke risk score for people with AF and includes congestive heart failure, hypertension, age ≥75 (doubled), diabetes, stroke (doubled), vascular disease, age 65 to 74 and sex category (female).</p> <p>HAS-BLED; is a risk score for major bleeding for patients on anticoagulation to assess risk-benefit in atrial fibrillation care and includes hypertension (uncontrolled, &gt;160mmHg systolic), renal disease, liver disease, stroke history, prior major bleeding, labile INR, age &gt;65, medication use predisposing to bleeding, alcohol use.</p> |                                                                                                                                                                       |                                                                                                                                                                        |          |           |                                                                                                        |

### Supplement S3.

**Table S2.** Risk of bias according to the ROBINS-I tool for the included cohort studies.

| Study            | ROBINS-I sub-category |           |                                 |                                       |              |                         |                               |                 |
|------------------|-----------------------|-----------|---------------------------------|---------------------------------------|--------------|-------------------------|-------------------------------|-----------------|
|                  | Confounding           | Selection | Classification of Interventions | Deviation from Intended Interventions | Missing Data | Measurement of Outcomes | Selection of Reported Results | Overall         |
| Abraham 2017     | Moderate              | Low       | Low                             | Low                                   | Low          | Low                     | Low                           | <b>Moderate</b> |
| Adeboyeje 2017   | Moderate              | Low       | Low                             | Low                                   | Low          | Low                     | Low                           | <b>Moderate</b> |
| Alcuskys 2020    | Moderate              | Low       | Low                             | Low                                   | Low          | Low                     | Low                           | <b>Moderate</b> |
| Al-Khalili 2016  | Moderate              | Low       | Low                             | Low                                   | Low          | Low                     | Low                           | <b>Moderate</b> |
| Amin 2017        | Moderate              | Low       | Low                             | Moderate                              | Low          | Low                     | Low                           | <b>Moderate</b> |
| Amin 2018        | Moderate              | Low       | Low                             | Low                                   | Low          | Low                     | Moderate                      | <b>Moderate</b> |
| Amin 2019(1)     | Moderate              | Low       | Low                             | Low                                   | Low          | Low                     | Low                           | <b>Moderate</b> |
| Amin 2019(2)     | Moderate              | Low       | Low                             | Moderate                              | Low          | Low                     | Low                           | <b>Moderate</b> |
| Andersson 2018   | Moderate              | Low       | Low                             | Low                                   | Low          | Low                     | Low                           | <b>Moderate</b> |
| Bang 2020        | Moderate              | Low       | Low                             | Moderate                              | Low          | Low                     | Low                           | <b>Moderate</b> |
| Bradley 2020     | Moderate              | Low       | Low                             | Low                                   | Low          | Low                     | Low                           | <b>Moderate</b> |
| Chan 2018        | Moderate              | Low       | Low                             | Low                                   | Low          | Low                     | Low                           | <b>Moderate</b> |
| Coleman 2016     | Moderate              | Low       | Low                             | Low                                   | Low          | Low                     | Low                           | <b>Moderate</b> |
| Coleman 2017     | Moderate              | Low       | Low                             | Low                                   | Moderate     | Low                     | Low                           | <b>Moderate</b> |
| Coleman 2018     | Moderate              | Low       | Low                             | Low                                   | Moderate     | Low                     | Low                           | <b>Moderate</b> |
| Deitelzweig 2016 | Moderate              | Low       | Low                             | Low                                   | Low          | Low                     | Low                           | <b>Moderate</b> |
| Deitelzweig 2017 | Moderate              | Low       | Low                             | Low                                   | Moderate     | Low                     | Moderate                      | <b>Moderate</b> |
| Durand 2020      | Moderate              | Low       | Low                             | Low                                   | Low          | Low                     | Low                           | <b>Moderate</b> |
| Fralick 2020     | Moderate              | Low       | Low                             | Low                                   | Moderate     | Moderate                | Low                           | <b>Moderate</b> |
| Graham 2019      | Moderate              | Low       | Low                             | Low                                   | Moderate     | Moderate                | Low                           | <b>Moderate</b> |

|                   | ROBINS-I sub-category |           |                                 |                                       |              |                         |                               |                 |
|-------------------|-----------------------|-----------|---------------------------------|---------------------------------------|--------------|-------------------------|-------------------------------|-----------------|
| Study             | Confounding           | Selection | Classification of Interventions | Deviation from Intended Interventions | Missing Data | Measurement of Outcomes | Selection of Reported Results | Overall         |
| Gupta 2019        | Moderate              | Low       | Low                             | Low                                   | Moderate     | Low                     | Low                           | <b>Moderate</b> |
| Halvorsen 2017    | Moderate              | Low       | Low                             | Low                                   | Low          | Moderate                | Low                           | <b>Moderate</b> |
| Hernandez 2017    | Moderate              | Low       | Low                             | Low                                   | Moderate     | Moderate                | Low                           | <b>Moderate</b> |
| Hohnloser 2017    | Moderate              | Low       | Low                             | Low                                   | Low          | Moderate                | Low                           | <b>Moderate</b> |
| Hohnloser 2018    | Moderate              | Low       | Low                             | Low                                   | Low          | Moderate                | Low                           | <b>Moderate</b> |
| Huybrechts 2020   | Moderate              | Moderate  | Low                             | Low                                   | Low          | Low                     | Low                           | <b>Moderate</b> |
| Jansson 2020      | Moderate              | Low       | Low                             | Low                                   | Low          | Low                     | Low                           | <b>Moderate</b> |
| Keshishian 2016   | Moderate              | Low       | Low                             | Low                                   | Low          | Low                     | Low                           | <b>Moderate</b> |
| Kjerpeseth 2019   | Moderate              | Moderate  | Low                             | Low                                   | Low          | Moderate                | Low                           | <b>Moderate</b> |
| Kohsaka 2017      | Moderate              | Low       | Low                             | Low                                   | Low          | Low                     | Low                           | <b>Moderate</b> |
| Kohsaka 2018      | Moderate              | Low       | Low                             | Low                                   | Low          | Low                     | Low                           | <b>Moderate</b> |
| Lamberts 2017     | Moderate              | Low       | Low                             | Moderate                              | Low          | Low                     | Low                           | <b>Moderate</b> |
| Larsen 2016       | Moderate              | Low       | Low                             | Low                                   | Low          | Low                     | Low                           | <b>Moderate</b> |
| Lee 2019          | Moderate              | Low       | Low                             | Low                                   | Low          | Low                     | Low                           | <b>Moderate</b> |
| Li 2017           | Moderate              | Low       | Low                             | Moderate                              | Low          | Low                     | Low                           | <b>Moderate</b> |
| Lin 2017          | Moderate              | Low       | Low                             | Low                                   | Low          | Low                     | Low                           | <b>Moderate</b> |
| Lip 2016(1)       | Moderate              | Low       | Low                             | Low                                   | Low          | Low                     | Low                           | <b>Moderate</b> |
| Lip 2016(2)       | Moderate              | Low       | Low                             | Low                                   | Low          | Low                     | Low                           | <b>Moderate</b> |
| Lip 2017          | Moderate              | Low       | Low                             | Low                                   | Low          | Low                     | Low                           | <b>Moderate</b> |
| Lip 2018          | Moderate              | Low       | Low                             | Low                                   | Low          | Low                     | Low                           | <b>Moderate</b> |
| Lip 2020          | Moderate              | Low       | Low                             | Low                                   | Low          | Low                     | Low                           | <b>Moderate</b> |
| Martinez 2018     | Moderate              | Low       | Low                             | Low                                   | Low          | Low                     | Low                           | <b>Moderate</b> |
| Mentias 2020      | Moderate              | Low       | Low                             | Low                                   | Low          | Low                     | Low                           | <b>Moderate</b> |
| Mitsuntisuk 20201 | Moderate              | Moderate  | Low                             | Low                                   | Low          | Low                     | Low                           | <b>Moderate</b> |
| Mueller 2019      | Moderate              | Low       | Low                             | Low                                   | Low          | Low                     | Moderate                      | <b>Moderate</b> |

|                      | ROBINS-I sub-category |           |                                 |                                       |              |                         |                               |                 |
|----------------------|-----------------------|-----------|---------------------------------|---------------------------------------|--------------|-------------------------|-------------------------------|-----------------|
| Study                | Confounding           | Selection | Classification of Interventions | Deviation from Intended Interventions | Missing Data | Measurement of Outcomes | Selection of Reported Results | Overall         |
| Nielson 2017         | Moderate              | Low       | Moderate                        | Low                                   | Low          | Low                     | Low                           | <b>Moderate</b> |
| Noseworthy 2016      | Moderate              | Low       | Low                             | Low                                   | Low          | Low                     | Low                           | <b>Moderate</b> |
| Noseworthy 2017      | Serious               | Low       | Low                             | Low                                   | Low          | Low                     | Low                           | <b>Serious</b>  |
| Perrault 2021        | Moderate              | Low       | Low                             | Low                                   | Low          | Low                     | Low                           | <b>Moderate</b> |
| Ramagopalan 2018     | Moderate              | Low       | Low                             | Low                                   | Low          | Low                     | Low                           | <b>Moderate</b> |
| Ramagopalan 2019     | Moderate              | Low       | Low                             | Low                                   | Low          | Low                     | Low                           | <b>Moderate</b> |
| Ray 2021             | Moderate              | Low       | Low                             | Low                                   | Low          | Low                     | Low                           | <b>Moderate</b> |
| Rodriguezbernal 2021 | Moderate              | Low       | Low                             | Low                                   | Low          | Low                     | Low                           | <b>Moderate</b> |
| Rutherford 2020      | Moderate              | Low       | Low                             | Low                                   | Low          | Low                     | Low                           | <b>Moderate</b> |
| Själänder 2018       | Moderate              | Low       | Low                             | Low                                   | Low          | Low                     | Low                           | <b>Moderate</b> |
| Staerk 2017          | Moderate              | Low       | Low                             | Low                                   | Low          | Low                     | Low                           | <b>Moderate</b> |
| Staerk 2018          | Moderate              | Low       | Low                             | Low                                   | Low          | Low                     | Low                           | <b>Moderate</b> |
| Tepper 2018          | Moderate              | Low       | Low                             | Low                                   | Low          | Low                     | Low                           | <b>Moderate</b> |
| Tiew 2020            | Moderate              | Low       | Low                             | Low                                   | Low          | Low                     | Low                           | <b>Moderate</b> |
| Van Ganse 2020       | Moderate              | Low       | Low                             | Low                                   | Moderate     | Moderate                | Low                           | <b>Moderate</b> |
| Villanes 2019        | Moderate              | Low       | Low                             | Low                                   | Moderate     | Moderate                | Low                           | <b>Moderate</b> |
| Vinogradova 2018     | Moderate              | Low       | Low                             | Low                                   | Low          | Low                     | Low                           | <b>Moderate</b> |
| Wanat 2019           | Moderate              | Low       | Low                             | Low                                   | Moderate     | Low                     | Low                           | <b>Moderate</b> |
| Yang 2020            | Moderate              | Low       | Low                             | Low                                   | Low          | Low                     | Low                           | <b>Moderate</b> |
| Yao 2016             | Moderate              | Low       | Low                             | Low                                   | Moderate     | Low                     | Low                           | <b>Moderate</b> |

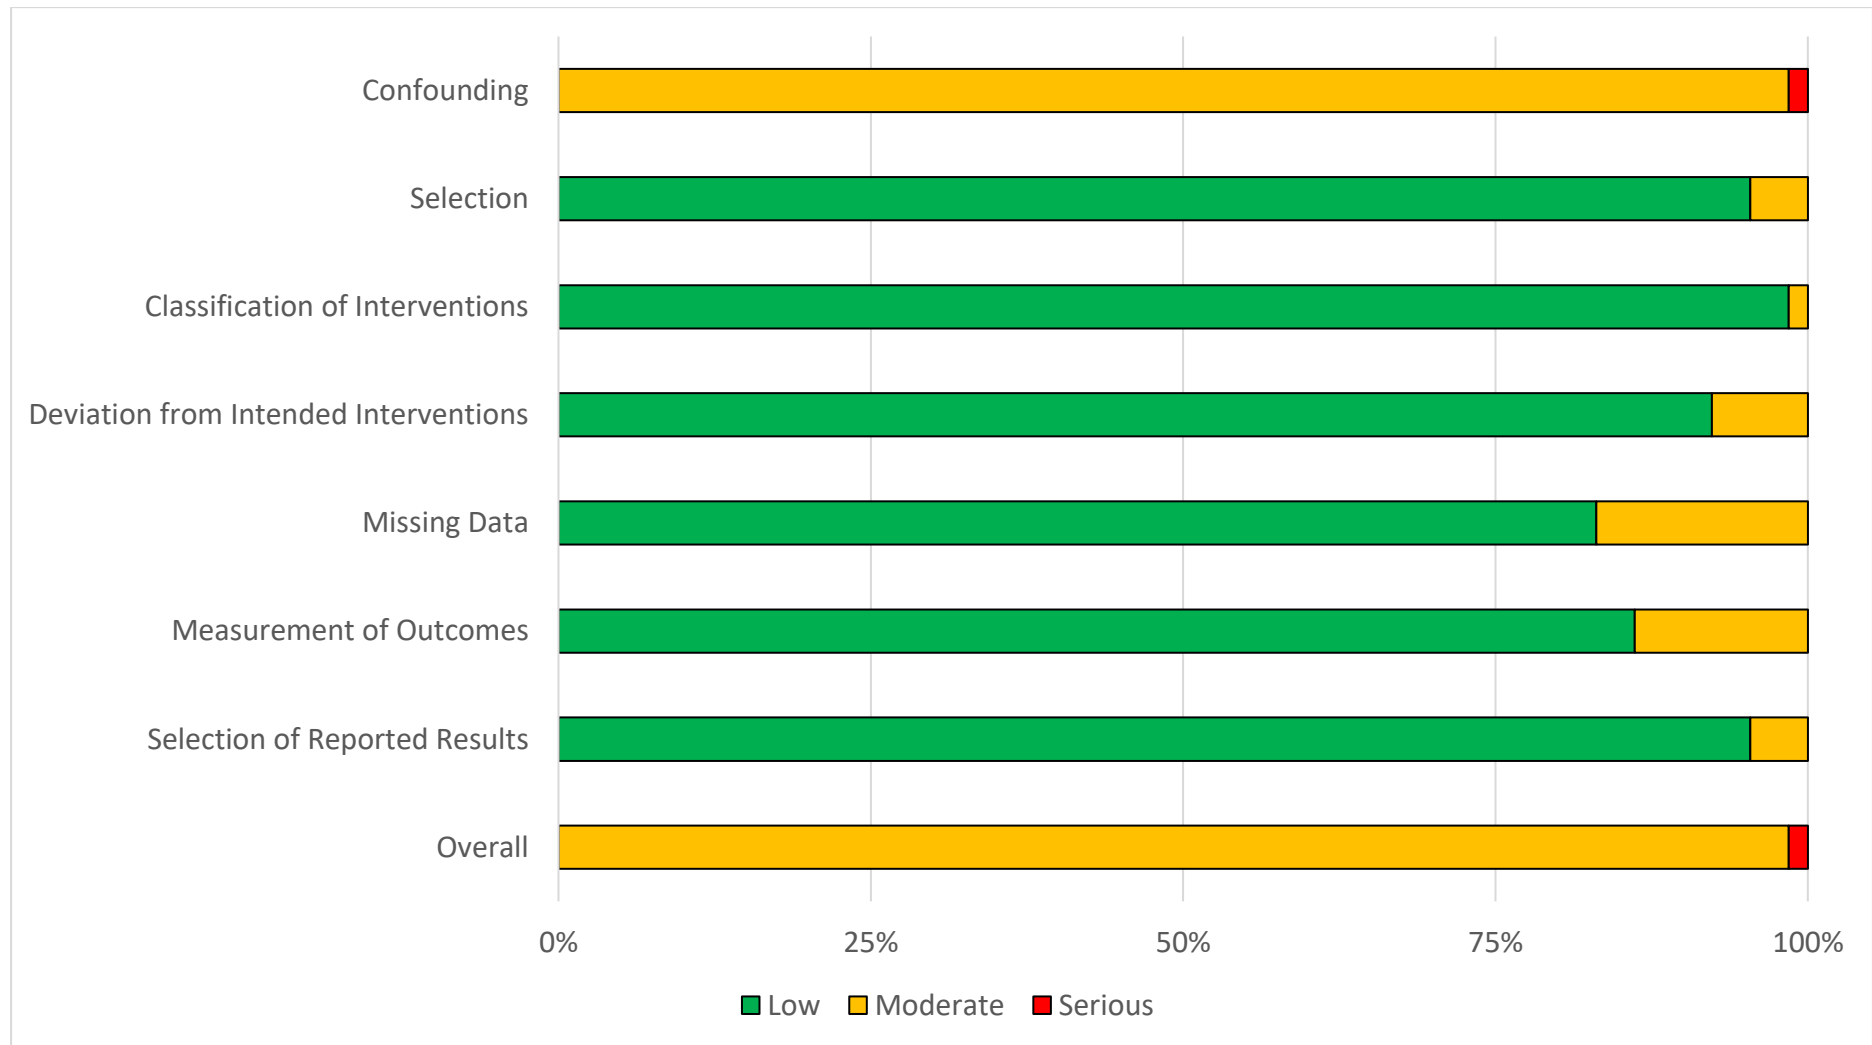

**Figure S1.** Graphical representation of the Risk of bias according to the ROBINS-I tool for the included cohort studies.

## Supplement S4. Sub-group meta-analyses

A

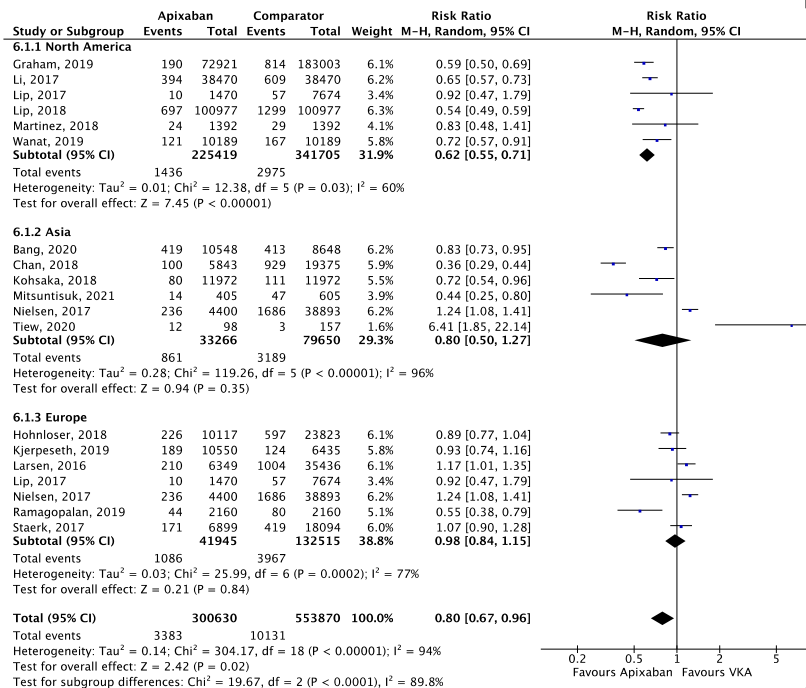

B

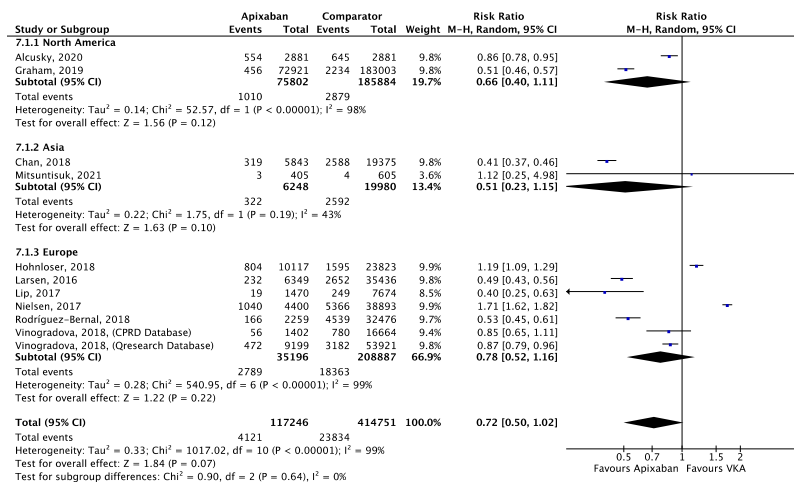

C

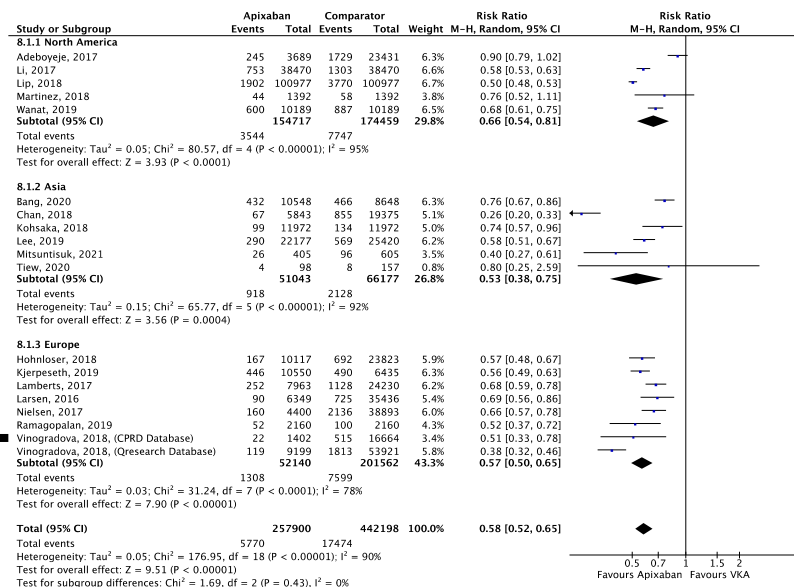

**Figure S2.** Comparison of apixaban vs VKAs stratified by geographic region (North America, Asia, Europe) for the outcomes stroke/SE (Panel A), mortality (Panel B), and major bleeding (Panel C).



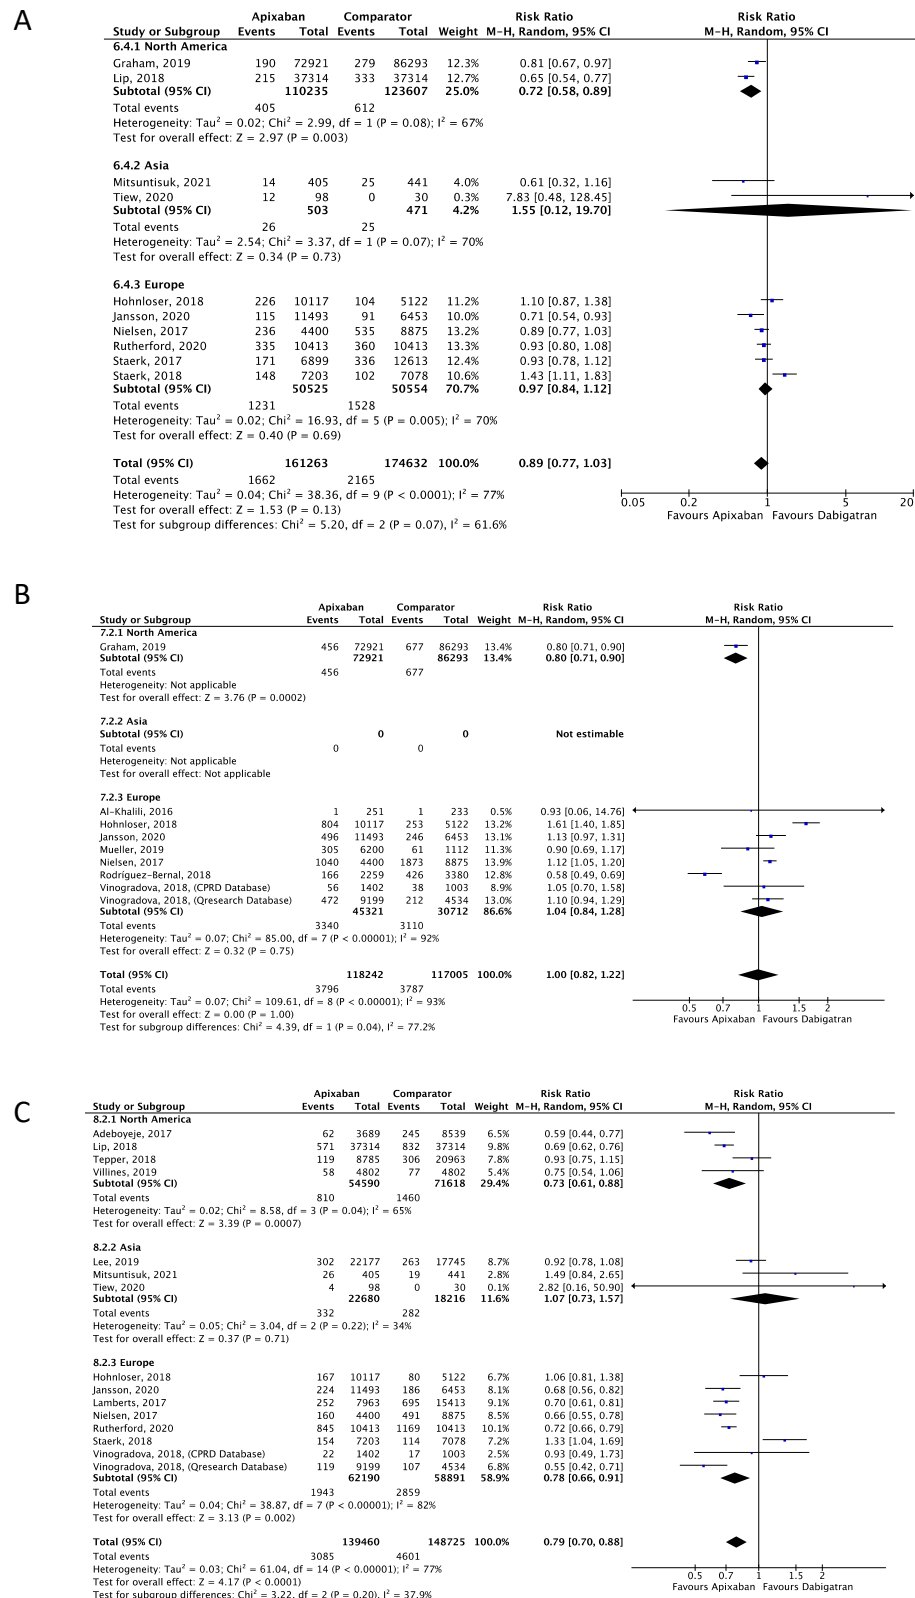

**Figure S3.** Comparison of apixaban vs dabigatran stratified by geographic region (North America, Asia, Europe) for the outcomes stroke/SE (Panel A), mortality (Panel B), and major bleeding (Panel C).

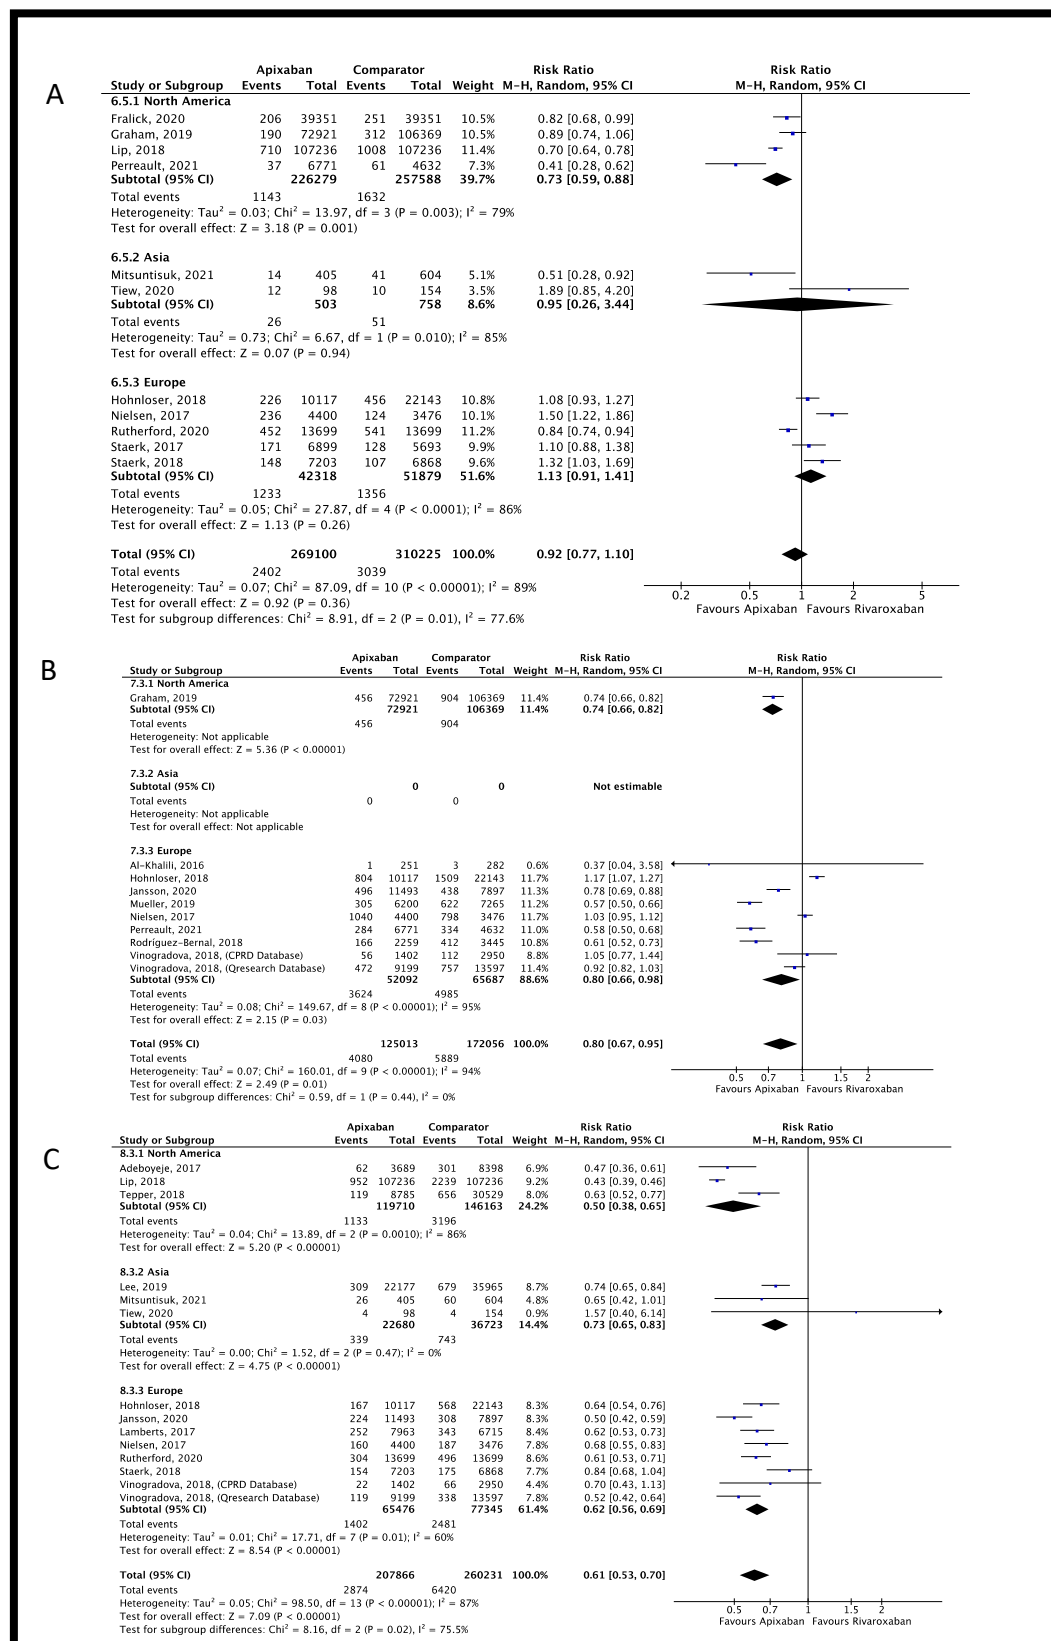

**Figure S4.** Comparison of apixaban vs rivaroxaban stratified by geographic region (North America, Asia, Europe) for the outcomes stroke/SE (Panel A), mortality (Panel B), and major bleeding (Panel C).
